# Supplementary material
Source: publisher figshare collection journal article supplement (https://acs.figshare.com/ndownloader/files/4340551)
Supplement: Supplementary file 1 [file 4340551]

#============================================================================   
                                                                                
# 1. SUBMISSION DETAILS                                                         
                                                                                
_publ_contact_author          # Name and address of author for correspondence   
;                                                                               
      
      Pinilla, Elena
      Departamento de Qu�mica Inorg�nica I
      Facultad de Ciencias Qu�micas 
      Universidad Complutense de Madrid
      28040 Madrid (Spain)
;                                                                               
_publ_contact_author_phone        '+34 91 3944285' 
_publ_contact_author_fax          '+34 91 3944352' 
_publ_contact_author_email        epinilla@quim.ucm.es 
                                                                                
_publ_requested_journal           'Organometallics'  
_publ_requested_coeditor_name     ?                                             
                                                                                
_publ_contact_letter                                                            
;                                                                               
  Please consider this CIF submission for publication as a Regular 
Structure Paper in Organometallics                                            
;                                                                               
                                                                                
#============================================================================   
                                                                                
# 2. PROCESSING SUMMARY (IUCr Office Use Only)                                  
                                                                                
_journal_date_recd_electronic     ?                                             
                                                                                
_journal_date_to_coeditor         ?                                             
_journal_date_from_coeditor       ?                                             
_journal_date_accepted            ?                                             
                                                                                
_journal_date_printers_first      ?                                             
_journal_date_printers_final      ?                                             
_journal_date_proofs_out          ?                                             
_journal_date_proofs_in           ?                                             
                                                                                
_journal_coeditor_name            ?                                             
_journal_coeditor_code            ?                                             
_journal_coeditor_notes                                                         
 ?                                                                              
                                                                                
_journal_techeditor_code          ?                                             
_journal_techeditor_notes                                                       
 ?                                                                              
                                                                                
_journal_coden_ASTM               ?                                             
_journal_name_full                ?                                             
_journal_year                     ?                                             
_journal_volume                   ?                                             
_journal_issue                    ?                                             
_journal_page_first               ?                                             
_journal_page_last                ?                                             
                                                                                
_journal_suppl_publ_number        ?                                             
_journal_suppl_publ_pages         ?                                             
                                                                                
#============================================================================   
                                                                                
# 3. TITLE AND AUTHOR LIST                                                      
                                                                                
_publ_section_title                                                             
;                                                                               
 Formation of new  norbornenylrhodium(III) complexes promoted by quinoline-
8-carbaldehyde and their rearrangement into nortricyclylrhodium(III) deri-
vatives. Formation of norbornene and nortricyclene.
;                                                                               
                                                                                
# The loop structure below should contain the names and addresses of all        
# authors, in the required order of publication. Repeat as necessary.           
                                                                                
loop_                                                                           
 _publ_author_name                                                              
 _publ_author_address                                                           

;
     'Barquin, Monserrat'
      Grupo de Qu�mica Inorg�nica
      Facultad de Qu�mica de San Sebasti�n
      Universidad del Pais Vasco
      Apartado 1072
      20080 San Sebasti�n (Spain)
;
     'Garralda, Mar�a A.'
      Grupo de Qu�mica Inorg�nica
      Facultad de Qu�mica de San Sebasti�n
      Universidad del Pais Vasco
      Apartado 1072
      20080 San Sebasti�n (Spain)
;                                
     'Ibarlucea, Lourdes'
      Grupo de Qu�mica Inorg�nica
      Facultad de Qu�mica de San Sebasti�n
      Universidad del Pais Vasco
      Apartado 1072
      20080 San Sebasti�n (Spain)
;
     'Mendicute-Fierro, Claudio'
      Grupo de Qu�mica Inorg�nica
      Facultad de Qu�mica de San Sebasti�n
      Universidad del Pais Vasco
      Apartado 1072
      20080 San Sebasti�n (Spain)
;                                                  
     'Pinilla, Elena'                                                      
      Departamento de Qu�mica Inorg�nica
      Facultad de Ciencias Qu�micas
      Universidad Complutense de Madrid
      28040 Madrid (Spain)
;                               
     'San Nacianceno, Virginia'
      Grupo de Quimica Inorganica
      Facultad de Qu�mica de San Sebasti�n
      Universidad del Pais Vasco
      Apartado 1072
      20080 San Sebasti�n (Spain)
;                                                                                                               
     'Torres, M. Rosario'                                                      
      Laboratorio de Difracci�n de Rayos X
      Facultad de Ciencias Qu�micas
      Universidad Complutense de Madrid 
      28040 Madrid (Spain)                               
;                            
                                                                                                                                 
#============================================================================   
                                                                                
data_[C22H20ClN2O1Rh]2.2CH2Cl2_complex_1    
  
_audit_creation_method            SHELXL-97 
_chemical_name_systematic 
; 
 ? 
; 
_chemical_name_common             ? 
_chemical_melting_point           ? 
_chemical_formula_moiety          ? 
_chemical_formula_sum 
 'C46 H44 Cl6 N4 O2 Rh2' 
_chemical_formula_weight          1103.37 
  
loop_ 
 _atom_type_symbol 
 _atom_type_description 
 _atom_type_scat_dispersion_real 
 _atom_type_scat_dispersion_imag 
 _atom_type_scat_source 
 'C'  'C'   0.0033   0.0016 
 'International Tables Vol C Tables 4.2.6.8 and 6.1.1.4' 
 'H'  'H'   0.0000   0.0000 
 'International Tables Vol C Tables 4.2.6.8 and 6.1.1.4' 
 'N'  'N'   0.0061   0.0033 
 'International Tables Vol C Tables 4.2.6.8 and 6.1.1.4' 
 'O'  'O'   0.0106   0.0060 
 'International Tables Vol C Tables 4.2.6.8 and 6.1.1.4' 
 'Cl'  'Cl'   0.1484   0.1585 
 'International Tables Vol C Tables 4.2.6.8 and 6.1.1.4' 
 'Rh'  'Rh'  -1.1178   0.9187 
 'International Tables Vol C Tables 4.2.6.8 and 6.1.1.4' 
  
_symmetry_cell_setting            Monoclinic 
_symmetry_space_group_name_H-M    P2(1)/n 
  
loop_ 
 _symmetry_equiv_pos_as_xyz 
 'x, y, z' 
 '-x+1/2, y+1/2, -z+1/2' 
 '-x, -y, -z' 
 'x-1/2, -y-1/2, z-1/2' 
  
_cell_length_a                    9.7543(12) 
_cell_length_b                    13.3278(16) 
_cell_length_c                    17.887(2) 
_cell_angle_alpha                 90.00 
_cell_angle_beta                  102.604(3) 
_cell_angle_gamma                 90.00 
_cell_volume                      2269.4(5) 
_cell_formula_units_Z             2 
_cell_measurement_temperature     296(2) 
_cell_measurement_reflns_used     723 
_cell_measurement_theta_min       2.33 
_cell_measurement_theta_max       16.11 
  
_exptl_crystal_description        neddle 
_exptl_crystal_colour             yellow 
_exptl_crystal_size_max           0.30 
_exptl_crystal_size_mid           0.04 
_exptl_crystal_size_min           0.04 
_exptl_crystal_density_meas       ? 
_exptl_crystal_density_diffrn     1.615 
_exptl_crystal_density_method     'not measured' 
_exptl_crystal_F_000              1112 
_exptl_absorpt_coefficient_mu     1.123 
_exptl_absorpt_correction_type    none 
_exptl_absorpt_correction_T_min   ? 
_exptl_absorpt_correction_T_max   ? 
_exptl_absorpt_process_details    ? 
  
_exptl_special_details 
; 
 ? 
; 
  
_diffrn_ambient_temperature       296(2) 
_diffrn_radiation_wavelength      0.71073 
_diffrn_radiation_type            MoK\a 
_diffrn_radiation_source          'fine-focus sealed tube' 
_diffrn_radiation_monochromator   graphite 
_diffrn_measurement_device_type   'CCD area detector' 
_diffrn_measurement_method        'phi and omega scans' 
_diffrn_detector_area_resol_mean  ? 
_diffrn_standards_number          ? 
_diffrn_standards_interval_count  ? 
_diffrn_standards_interval_time   ? 
_diffrn_standards_decay_%         ? 
_diffrn_reflns_number             17156 
_diffrn_reflns_av_R_equivalents   0.2196 
_diffrn_reflns_av_sigmaI/netI     0.3230 
_diffrn_reflns_limit_h_min        -11 
_diffrn_reflns_limit_h_max        11 
_diffrn_reflns_limit_k_min        -15 
_diffrn_reflns_limit_k_max        13 
_diffrn_reflns_limit_l_min        -21 
_diffrn_reflns_limit_l_max        21 
_diffrn_reflns_theta_min          1.92 
_diffrn_reflns_theta_max          25.00 
_reflns_number_total              3963 
_reflns_number_gt                 1232 
_reflns_threshold_expression      >2sigma(I) 
  
_computing_data_collection        'Bruker SMART' 
_computing_cell_refinement        'Bruker SMART' 
_computing_data_reduction         'Bruker SAINT' 
_computing_structure_solution     'SHELXS-97 (Sheldrick, 1990)' 
_computing_structure_refinement   'SHELXL-97 (Sheldrick, 1997)' 
_computing_molecular_graphics     'Bruker SHELXTL' 
_computing_publication_material   'Bruker SHELXTL' 
  
_refine_special_details 
 The norbornenyl group was found in a no resolvable disordered position 
with its carbon atoms showing very large anisotropic displacement 
parameters, which were refined with geometrical restraints and a variable
common carbon-carbon distance. 
; 
 Refinement of F^2^ against ALL reflections.  The weighted R-factor wR and 
 goodness of fit S are based on F^2^, conventional R-factors R are based 
 on F, with F set to zero for negative F^2^. The threshold expression of 
 F^2^ > 2sigma(F^2^) is used only for calculating R-factors(gt) etc. and is 
 not relevant to the choice of reflections for refinement.  R-factors based 
 on F^2^ are statistically about twice as large as those based on F, and R- 
 factors based on ALL data will be even larger. 
; 
  
_refine_ls_structure_factor_coef  Fsqd 
_refine_ls_matrix_type            full 
_refine_ls_weighting_scheme       calc 
_refine_ls_weighting_details 
 'calc w=1/[\s^2^(Fo^2^)+(0.0760P)^2^+0.0000P] where P=(Fo^2^+2Fc^2^)/3' 
_atom_sites_solution_primary      direct 
_atom_sites_solution_secondary    difmap 
_atom_sites_solution_hydrogens    geom 
_refine_ls_hydrogen_treatment     constr 
_refine_ls_extinction_method      none 
_refine_ls_extinction_coef        ? 
_refine_ls_number_reflns          3963 
_refine_ls_number_parameters      256 
_refine_ls_number_restraints      8 
_refine_ls_R_factor_all           0.2438 
_refine_ls_R_factor_gt            0.0768 
_refine_ls_wR_factor_ref          0.2306 
_refine_ls_wR_factor_gt           0.1819 
_refine_ls_goodness_of_fit_ref    0.970 
_refine_ls_restrained_S_all       0.969 
_refine_ls_shift/su_max           0.039 
_refine_ls_shift/su_mean          0.003 
  
loop_ 
 _atom_site_label 
 _atom_site_type_symbol 
 _atom_site_fract_x 
 _atom_site_fract_y 
 _atom_site_fract_z 
 _atom_site_U_iso_or_equiv 
 _atom_site_adp_type 
 _atom_site_occupancy 
 _atom_site_symmetry_multiplicity 
 _atom_site_calc_flag 
 _atom_site_refinement_flags 
 _atom_site_disorder_assembly 
 _atom_site_disorder_group 
Rh1 Rh 0.97265(13) 0.13364(9) 0.95589(7) 0.0456(5) Uani 1 1 d . . . 
Cl1 Cl 0.8250(4) -0.0036(3) 1.0003(2) 0.0502(11) Uani 1 1 d . . . 
N1 N 1.0039(15) 0.1923(9) 1.0628(7) 0.045(3) Uani 1 1 d . . . 
N2 N 0.9310(15) 0.0734(9) 0.8475(7) 0.046(3) Uani 1 1 d . . . 
O1 O 0.7350(12) 0.2473(8) 0.8762(7) 0.077(4) Uani 1 1 d . . . 
C1 C 1.116(3) 0.2286(14) 0.9233(11) 0.110(9) Uani 1 1 d D . . 
H1 H 1.1753 0.1790 0.9046 0.132 Uiso 1 1 calc R . . 
C2 C 1.073(3) 0.2912(15) 0.8527(13) 0.178(12) Uani 1 1 d D . . 
H2A H 0.9716 0.2963 0.8380 0.213 Uiso 1 1 calc R . . 
H2B H 1.1071 0.2620 0.8105 0.213 Uiso 1 1 calc R . . 
C3 C 1.139(3) 0.3945(16) 0.8731(15) 0.180(15) Uani 1 1 d D . . 
H3 H 1.1379 0.4437 0.8323 0.216 Uiso 1 1 calc R . . 
C4 C 1.063(4) 0.418(3) 0.9349(18) 0.223(19) Uani 1 1 d D . . 
H4 H 0.9783 0.4505 0.9326 0.268 Uiso 1 1 calc R . . 
C5 C 1.151(4) 0.378(2) 0.9935(17) 0.24(2) Uani 1 1 d D . . 
H5 H 1.1624 0.4051 1.0424 0.283 Uiso 1 1 calc R . . 
C6 C 1.231(2) 0.2881(19) 0.9783(14) 0.174(14) Uani 1 1 d D . . 
H6 H 1.2986 0.2548 1.0195 0.209 Uiso 1 1 calc R . . 
C7 C 1.280(3) 0.3569(18) 0.9201(16) 0.154(11) Uani 1 1 d D . . 
H7A H 1.3375 0.4117 0.9453 0.185 Uiso 1 1 calc R . . 
H7B H 1.3318 0.3198 0.8886 0.185 Uiso 1 1 calc R . . 
C8 C 0.8153(16) 0.2210(11) 0.9361(9) 0.051(5) Uani 1 1 d . . . 
C9 C 0.7871(19) 0.2621(11) 1.0105(10) 0.055(5) Uani 1 1 d . . . 
C10 C 0.894(2) 0.2478(12) 1.0772(9) 0.056(5) Uani 1 1 d . . . 
C11 C 1.112(2) 0.1832(12) 1.1182(10) 0.069(6) Uani 1 1 d . . . 
H11 H 1.1915 0.1509 1.1096 0.083 Uiso 1 1 calc R . . 
C12 C 1.112(2) 0.2219(13) 1.1935(10) 0.077(6) Uani 1 1 d . . . 
H12 H 1.1907 0.2115 1.2326 0.093 Uiso 1 1 calc R . . 
C13 C 1.004(2) 0.2717(14) 1.2086(11) 0.083(6) Uani 1 1 d . . . 
H13 H 1.0054 0.2959 1.2575 0.100 Uiso 1 1 calc R . . 
C14 C 0.886(2) 0.2869(12) 1.1462(11) 0.063(5) Uani 1 1 d . . . 
C15 C 0.760(3) 0.3370(15) 1.1537(12) 0.097(8) Uani 1 1 d . . . 
H15 H 0.7504 0.3611 1.2010 0.117 Uiso 1 1 calc R . . 
C16 C 0.658(2) 0.3486(14) 1.0921(12) 0.079(6) Uani 1 1 d . . . 
H16 H 0.5757 0.3807 1.0972 0.094 Uiso 1 1 calc R . . 
C17 C 0.669(2) 0.3143(12) 1.0194(11) 0.080(6) Uani 1 1 d . . . 
H17 H 0.5964 0.3267 0.9771 0.096 Uiso 1 1 calc R . . 
C18 C 0.802(2) 0.0604(11) 0.8065(9) 0.060(5) Uani 1 1 d . . . 
H18 H 0.7276 0.0799 0.8277 0.072 Uiso 1 1 calc R . . 
C19 C 0.772(2) 0.0192(13) 0.7334(10) 0.093(7) Uani 1 1 d . . . 
H19 H 0.6795 0.0131 0.7068 0.112 Uiso 1 1 calc R . . 
C20 C 0.879(3) -0.0127(13) 0.7000(10) 0.077(6) Uani 1 1 d . . . 
H20 H 0.8611 -0.0409 0.6513 0.092 Uiso 1 1 calc R . . 
C21 C 1.013(2) -0.0012(14) 0.7415(11) 0.083(6) Uani 1 1 d . . . 
H21 H 1.0892 -0.0217 0.7216 0.099 Uiso 1 1 calc R . . 
C22 C 1.034(2) 0.0416(12) 0.8141(10) 0.070(6) Uani 1 1 d . . . 
H22 H 1.1266 0.0488 0.8415 0.085 Uiso 1 1 calc R . . 
C23 C 0.458(2) 0.9460(16) 0.8979(13) 0.144(9) Uiso 1 1 d . . . 
H23A H 0.5315 0.9347 0.9431 0.172 Uiso 1 1 calc R . . 
H23B H 0.3700 0.9254 0.9108 0.172 Uiso 1 1 calc R . . 
Cl2 Cl 0.4477(8) 1.0730(6) 0.8810(4) 0.175(3) Uiso 1 1 d . . . 
Cl3 Cl 0.4863(9) 0.8707(7) 0.8305(5) 0.213(4) Uiso 1 1 d . . . 
  
loop_ 
 _atom_site_aniso_label 
 _atom_site_aniso_U_11 
 _atom_site_aniso_U_22 
 _atom_site_aniso_U_33 
 _atom_site_aniso_U_23 
 _atom_site_aniso_U_13 
 _atom_site_aniso_U_12 
Rh1 0.0528(8) 0.0480(8) 0.0341(7) -0.0012(8) 0.0051(6) -0.0029(9) 
Cl1 0.044(3) 0.055(3) 0.051(2) -0.004(2) 0.010(2) -0.004(2) 
N1 0.063(10) 0.031(8) 0.036(9) -0.004(6) 0.000(8) -0.003(8) 
N2 0.049(9) 0.048(9) 0.037(8) -0.007(7) 0.000(8) -0.009(7) 
O1 0.098(10) 0.063(8) 0.064(8) 0.005(7) 0.005(7) 0.024(7) 
C1 0.23(3) 0.052(14) 0.059(14) -0.023(12) 0.052(17) -0.047(17) 
C2 0.20(3) 0.12(3) 0.20(3) -0.04(2) 0.00(3) -0.06(2) 
C3 0.23(4) 0.10(2) 0.18(3) 0.06(2) -0.02(3) -0.10(3) 
C4 0.28(4) 0.30(5) 0.11(2) 0.01(3) 0.08(3) 0.13(4) 
C5 0.43(6) 0.15(3) 0.10(2) -0.02(2) -0.02(3) -0.08(4) 
C6 0.16(3) 0.09(2) 0.29(4) 0.05(3) 0.09(3) -0.04(2) 
C7 0.15(3) 0.089(19) 0.23(3) 0.04(2) 0.05(2) -0.068(19) 
C8 0.061(12) 0.045(11) 0.039(10) 0.013(9) -0.009(9) 0.010(9) 
C9 0.069(13) 0.031(10) 0.065(13) -0.013(9) 0.011(11) 0.003(10) 
C10 0.077(14) 0.050(12) 0.042(11) -0.014(10) 0.017(11) -0.010(11) 
C11 0.085(15) 0.062(12) 0.050(12) -0.023(10) -0.008(11) -0.005(11) 
C12 0.109(18) 0.053(13) 0.050(13) -0.002(10) -0.027(12) -0.012(12) 
C13 0.120(19) 0.072(15) 0.049(13) 0.007(11) 0.002(14) 0.019(14) 
C14 0.084(15) 0.045(12) 0.063(14) 0.003(10) 0.022(13) 0.014(11) 
C15 0.16(2) 0.077(17) 0.068(15) -0.023(13) 0.050(16) -0.011(16) 
C16 0.086(16) 0.086(16) 0.079(14) -0.029(14) 0.050(13) 0.000(13) 
C17 0.099(16) 0.051(12) 0.090(16) 0.005(11) 0.021(13) 0.011(12) 
C18 0.069(14) 0.054(12) 0.050(11) -0.012(9) -0.004(10) 0.003(10) 
C19 0.109(18) 0.087(16) 0.056(13) -0.028(12) -0.044(13) 0.033(13) 
C20 0.14(2) 0.057(13) 0.036(12) -0.021(10) 0.021(14) -0.017(14) 
C21 0.123(19) 0.084(16) 0.053(13) -0.008(12) 0.044(13) -0.023(15) 
C22 0.094(16) 0.066(13) 0.057(13) -0.010(10) 0.029(12) -0.015(12) 
  
_geom_special_details 
; 
 All esds (except the esd in the dihedral angle between two l.s. planes) 
 are estimated using the full covariance matrix.  The cell esds are taken 
 into account individually in the estimation of esds in distances, angles 
 and torsion angles; correlations between esds in cell parameters are only 
 used when they are defined by crystal symmetry.  An approximate (isotropic) 
 treatment of cell esds is used for estimating esds involving l.s. planes. 
; 
  
loop_ 
 _geom_bond_atom_site_label_1 
 _geom_bond_atom_site_label_2 
 _geom_bond_distance 
 _geom_bond_site_symmetry_2 
 _geom_bond_publ_flag 
Rh1 C8 1.898(15) . ? 
Rh1 N1 2.026(12) . ? 
Rh1 N2 2.056(12) . ? 
Rh1 C1 2.07(2) . ? 
Rh1 Cl1 2.559(4) . ? 
Rh1 Cl1 2.615(4) 3_757 ? 
Cl1 Rh1 2.615(4) 3_757 ? 
N1 C11 1.285(17) . ? 
N1 C10 1.373(18) . ? 
N2 C18 1.319(17) . ? 
N2 C22 1.349(18) . ? 
O1 C8 1.231(15) . ? 
C1 C2 1.495(5) . ? 
C1 C6 1.539(5) . ? 
C1 H1 0.9800 . ? 
C2 C3 1.529(5) . ? 
C2 H2A 0.9700 . ? 
C2 H2B 0.9700 . ? 
C3 C7 1.533(5) . ? 
C3 C4 1.488(5) . ? 
C3 H3 0.9800 . ? 
C4 C5 1.309(5) . ? 
C4 H4 0.9300 . ? 
C5 C6 1.490(5) . ? 
C5 H5 0.9300 . ? 
C6 C7 1.538(5) . ? 
C6 H6 0.9800 . ? 
C7 H7A 0.9700 . ? 
C7 H7B 0.9700 . ? 
C8 C9 1.52(2) . ? 
C9 C10 1.416(19) . ? 
C9 C17 1.39(2) . ? 
C10 C14 1.36(2) . ? 
C11 C12 1.44(2) . ? 
C11 H11 0.9300 . ? 
C12 C13 1.32(2) . ? 
C12 H12 0.9300 . ? 
C13 C14 1.44(2) . ? 
C13 H13 0.9300 . ? 
C14 C15 1.43(2) . ? 
C15 C16 1.32(2) . ? 
C15 H15 0.9300 . ? 
C16 C17 1.40(2) . ? 
C16 H16 0.9300 . ? 
C17 H17 0.9300 . ? 
C18 C19 1.39(2) . ? 
C18 H18 0.9300 . ? 
C19 C20 1.38(2) . ? 
C19 H19 0.9300 . ? 
C20 C21 1.36(2) . ? 
C20 H20 0.9300 . ? 
C21 C22 1.39(2) . ? 
C21 H21 0.9300 . ? 
C22 H22 0.9300 . ? 
C23 Cl3 1.64(2) . ? 
C23 Cl2 1.72(2) . ? 
C23 H23A 0.9700 . ? 
C23 H23B 0.9700 . ? 
  
loop_ 
 _geom_angle_atom_site_label_1 
 _geom_angle_atom_site_label_2 
 _geom_angle_atom_site_label_3 
 _geom_angle 
 _geom_angle_site_symmetry_1 
 _geom_angle_site_symmetry_3 
 _geom_angle_publ_flag 
C8 Rh1 N1 83.6(6) . . ? 
C8 Rh1 N2 94.5(6) . . ? 
N1 Rh1 N2 177.3(6) . . ? 
C8 Rh1 C1 98.2(9) . . ? 
N1 Rh1 C1 93.3(6) . . ? 
N2 Rh1 C1 88.8(6) . . ? 
C8 Rh1 Cl1 90.6(5) . . ? 
N1 Rh1 Cl1 87.8(3) . . ? 
N2 Rh1 Cl1 90.3(4) . . ? 
C1 Rh1 Cl1 171.2(7) . . ? 
C8 Rh1 Cl1 171.7(5) . 3_757 ? 
N1 Rh1 Cl1 91.4(4) . 3_757 ? 
N2 Rh1 Cl1 90.3(4) . 3_757 ? 
C1 Rh1 Cl1 88.6(7) . 3_757 ? 
Cl1 Rh1 Cl1 82.65(13) . 3_757 ? 
Rh1 Cl1 Rh1 97.35(13) . 3_757 ? 
C11 N1 C10 116.5(14) . . ? 
C11 N1 Rh1 128.4(12) . . ? 
C10 N1 Rh1 115.0(11) . . ? 
C18 N2 C22 115.1(14) . . ? 
C18 N2 Rh1 123.0(11) . . ? 
C22 N2 Rh1 121.8(12) . . ? 
C2 C1 C6 106.5(16) . . ? 
C2 C1 Rh1 120(2) . . ? 
C6 C1 Rh1 125.3(13) . . ? 
C2 C1 H1 99.7 . . ? 
C6 C1 H1 99.6 . . ? 
Rh1 C1 H1 99.7 . . ? 
C1 C2 C3 105.9(16) . . ? 
C1 C2 H2A 110.5 . . ? 
C3 C2 H2A 110.5 . . ? 
C1 C2 H2B 110.6 . . ? 
C3 C2 H2B 110.6 . . ? 
H2A C2 H2B 108.7 . . ? 
C7 C3 C4 101(2) . . ? 
C7 C3 C2 96.7(19) . . ? 
C4 C3 C2 97(2) . . ? 
C7 C3 H3 119.3 . . ? 
C4 C3 H3 119.3 . . ? 
C2 C3 H3 119.3 . . ? 
C5 C4 C3 100(3) . . ? 
C5 C4 H4 130.2 . . ? 
C3 C4 H4 130.1 . . ? 
C4 C5 C6 117(2) . . ? 
C4 C5 H5 121.4 . . ? 
C6 C5 H5 121.5 . . ? 
C7 C6 C5 84.0(19) . . ? 
C7 C6 C1 99.4(16) . . ? 
C5 C6 C1 101(2) . . ? 
C7 C6 H6 121.5 . . ? 
C5 C6 H6 121.4 . . ? 
C1 C6 H6 121.5 . . ? 
C3 C7 C6 101.1(17) . . ? 
C3 C7 H7A 111.6 . . ? 
C6 C7 H7A 111.6 . . ? 
C3 C7 H7B 111.6 . . ? 
C6 C7 H7B 111.5 . . ? 
H7A C7 H7B 109.4 . . ? 
O1 C8 C9 117.2(15) . . ? 
O1 C8 Rh1 132.2(13) . . ? 
C9 C8 Rh1 110.6(11) . . ? 
C10 C9 C17 116.7(17) . . ? 
C10 C9 C8 116.7(15) . . ? 
C17 C9 C8 126.6(17) . . ? 
N1 C10 C9 112.0(15) . . ? 
N1 C10 C14 125.6(18) . . ? 
C9 C10 C14 122.4(19) . . ? 
N1 C11 C12 121.4(18) . . ? 
N1 C11 H11 119.3 . . ? 
C12 C11 H11 119.3 . . ? 
C13 C12 C11 122.2(19) . . ? 
C13 C12 H12 118.9 . . ? 
C11 C12 H12 118.9 . . ? 
C12 C13 C14 117.0(19) . . ? 
C12 C13 H13 121.5 . . ? 
C14 C13 H13 121.5 . . ? 
C10 C14 C13 117.0(18) . . ? 
C10 C14 C15 119.2(19) . . ? 
C13 C14 C15 123.8(19) . . ? 
C16 C15 C14 118.9(19) . . ? 
C16 C15 H15 120.5 . . ? 
C14 C15 H15 120.6 . . ? 
C15 C16 C17 122.5(19) . . ? 
C15 C16 H16 118.8 . . ? 
C17 C16 H16 118.8 . . ? 
C9 C17 C16 120.2(18) . . ? 
C9 C17 H17 119.9 . . ? 
C16 C17 H17 119.9 . . ? 
N2 C18 C19 123.8(17) . . ? 
N2 C18 H18 118.1 . . ? 
C19 C18 H18 118.1 . . ? 
C20 C19 C18 120.3(18) . . ? 
C20 C19 H19 119.8 . . ? 
C18 C19 H19 119.8 . . ? 
C19 C20 C21 117.2(17) . . ? 
C19 C20 H20 121.4 . . ? 
C21 C20 H20 121.4 . . ? 
C20 C21 C22 119.0(19) . . ? 
C20 C21 H21 120.5 . . ? 
C22 C21 H21 120.5 . . ? 
N2 C22 C21 124.6(18) . . ? 
N2 C22 H22 117.7 . . ? 
C21 C22 H22 117.7 . . ? 
Cl3 C23 Cl2 119.0(14) . . ? 
Cl3 C23 H23A 107.6 . . ? 
Cl2 C23 H23A 107.6 . . ? 
Cl3 C23 H23B 107.6 . . ? 
Cl2 C23 H23B 107.6 . . ? 
H23A C23 H23B 107.0 . . ? 
  
loop_ 
 _geom_torsion_atom_site_label_1 
 _geom_torsion_atom_site_label_2 
 _geom_torsion_atom_site_label_3 
 _geom_torsion_atom_site_label_4 
 _geom_torsion 
 _geom_torsion_site_symmetry_1 
 _geom_torsion_site_symmetry_2 
 _geom_torsion_site_symmetry_3 
 _geom_torsion_site_symmetry_4 
 _geom_torsion_publ_flag 
C8 Rh1 Cl1 Rh1 -175.3(5) . . . 3_757 ? 
N1 Rh1 Cl1 Rh1 -91.7(4) . . . 3_757 ? 
N2 Rh1 Cl1 Rh1 90.2(4) . . . 3_757 ? 
C1 Rh1 Cl1 Rh1 6(4) . . . 3_757 ? 
Cl1 Rh1 Cl1 Rh1 0.0 3_757 . . 3_757 ? 
C8 Rh1 N1 C11 -169.1(15) . . . . ? 
N2 Rh1 N1 C11 146(10) . . . . ? 
C1 Rh1 N1 C11 -71.2(16) . . . . ? 
Cl1 Rh1 N1 C11 100.1(14) . . . . ? 
Cl1 Rh1 N1 C11 17.5(14) 3_757 . . . ? 
C8 Rh1 N1 C10 11.8(11) . . . . ? 
N2 Rh1 N1 C10 -33(10) . . . . ? 
C1 Rh1 N1 C10 109.7(12) . . . . ? 
Cl1 Rh1 N1 C10 -79.0(10) . . . . ? 
Cl1 Rh1 N1 C10 -161.6(10) 3_757 . . . ? 
C8 Rh1 N2 C18 -33.4(13) . . . . ? 
N1 Rh1 N2 C18 11(11) . . . . ? 
C1 Rh1 N2 C18 -131.6(14) . . . . ? 
Cl1 Rh1 N2 C18 57.2(12) . . . . ? 
Cl1 Rh1 N2 C18 139.8(12) 3_757 . . . ? 
C8 Rh1 N2 C22 148.5(12) . . . . ? 
N1 Rh1 N2 C22 -167(10) . . . . ? 
C1 Rh1 N2 C22 50.4(14) . . . . ? 
Cl1 Rh1 N2 C22 -120.9(12) . . . . ? 
Cl1 Rh1 N2 C22 -38.3(12) 3_757 . . . ? 
C8 Rh1 C1 C2 -41.9(18) . . . . ? 
N1 Rh1 C1 C2 -126.0(18) . . . . ? 
N2 Rh1 C1 C2 52.4(18) . . . . ? 
Cl1 Rh1 C1 C2 137(3) . . . . ? 
Cl1 Rh1 C1 C2 142.7(17) 3_757 . . . ? 
C8 Rh1 C1 C6 102(2) . . . . ? 
N1 Rh1 C1 C6 18(2) . . . . ? 
N2 Rh1 C1 C6 -164(2) . . . . ? 
Cl1 Rh1 C1 C6 -80(4) . . . . ? 
Cl1 Rh1 C1 C6 -73(2) 3_757 . . . ? 
C6 C1 C2 C3 -12(3) . . . . ? 
Rh1 C1 C2 C3 138.3(18) . . . . ? 
C1 C2 C3 C7 40(3) . . . . ? 
C1 C2 C3 C4 -62(3) . . . . ? 
C7 C3 C4 C5 -9(4) . . . . ? 
C2 C3 C4 C5 89(3) . . . . ? 
C3 C4 C5 C6 -32(4) . . . . ? 
C4 C5 C6 C7 56(4) . . . . ? 
C4 C5 C6 C1 -42(4) . . . . ? 
C2 C1 C6 C7 -22(3) . . . . ? 
Rh1 C1 C6 C7 -169.5(18) . . . . ? 
C2 C1 C6 C5 64(3) . . . . ? 
Rh1 C1 C6 C5 -84(2) . . . . ? 
C4 C3 C7 C6 44(3) . . . . ? 
C2 C3 C7 C6 -54(2) . . . . ? 
C5 C6 C7 C3 -53(2) . . . . ? 
C1 C6 C7 C3 48(3) . . . . ? 
N1 Rh1 C8 O1 168.8(17) . . . . ? 
N2 Rh1 C8 O1 -13.1(17) . . . . ? 
C1 Rh1 C8 O1 76.3(17) . . . . ? 
Cl1 Rh1 C8 O1 -103.5(16) . . . . ? 
Cl1 Rh1 C8 O1 -138(3) 3_757 . . . ? 
N1 Rh1 C8 C9 -12.6(10) . . . . ? 
N2 Rh1 C8 C9 165.5(11) . . . . ? 
C1 Rh1 C8 C9 -105.1(11) . . . . ? 
Cl1 Rh1 C8 C9 75.2(10) . . . . ? 
Cl1 Rh1 C8 C9 41(4) 3_757 . . . ? 
O1 C8 C9 C10 -168.1(15) . . . . ? 
Rh1 C8 C9 C10 13.1(18) . . . . ? 
O1 C8 C9 C17 10(3) . . . . ? 
Rh1 C8 C9 C17 -168.6(14) . . . . ? 
C11 N1 C10 C9 173.8(14) . . . . ? 
Rh1 N1 C10 C9 -7.0(17) . . . . ? 
C11 N1 C10 C14 -5(2) . . . . ? 
Rh1 N1 C10 C14 173.9(13) . . . . ? 
C17 C9 C10 N1 177.8(13) . . . . ? 
C8 C9 C10 N1 -4(2) . . . . ? 
C17 C9 C10 C14 -3(2) . . . . ? 
C8 C9 C10 C14 175.4(14) . . . . ? 
C10 N1 C11 C12 5(2) . . . . ? 
Rh1 N1 C11 C12 -173.9(11) . . . . ? 
N1 C11 C12 C13 -3(3) . . . . ? 
C11 C12 C13 C14 -1(3) . . . . ? 
N1 C10 C14 C13 2(3) . . . . ? 
C9 C10 C14 C13 -176.7(15) . . . . ? 
N1 C10 C14 C15 -175.6(15) . . . . ? 
C9 C10 C14 C15 5(3) . . . . ? 
C12 C13 C14 C10 1(3) . . . . ? 
C12 C13 C14 C15 178.4(18) . . . . ? 
C10 C14 C15 C16 -3(3) . . . . ? 
C13 C14 C15 C16 178.8(19) . . . . ? 
C14 C15 C16 C17 -1(3) . . . . ? 
C10 C9 C17 C16 -1(2) . . . . ? 
C8 C9 C17 C16 -179.4(15) . . . . ? 
C15 C16 C17 C9 3(3) . . . . ? 
C22 N2 C18 C19 -1(2) . . . . ? 
Rh1 N2 C18 C19 -179.5(13) . . . . ? 
N2 C18 C19 C20 1(3) . . . . ? 
C18 C19 C20 C21 0(3) . . . . ? 
C19 C20 C21 C22 0(3) . . . . ? 
C18 N2 C22 C21 1(2) . . . . ? 
Rh1 N2 C22 C21 178.9(13) . . . . ? 
C20 C21 C22 N2 0(3) . . . . ? 
  
_diffrn_measured_fraction_theta_max    0.991 
_diffrn_reflns_theta_full              25.00 
_diffrn_measured_fraction_theta_full   0.991 
_refine_diff_density_max    1.752 
_refine_diff_density_min   -1.104 
_refine_diff_density_rms    0.154 


#===============================================END                                   
  
data_[C26H23ClN3O1Rh]1/2CH2Cl2]_complex_4a
  
_audit_creation_method            SHELXL-97 
_chemical_name_systematic 
; 
 ? 
; 
_chemical_name_common             ? 
_chemical_melting_point           ? 
_chemical_formula_moiety          ? 
_chemical_formula_sum 
 'C26.50 H24 Cl2 N3 O Rh' 
_chemical_formula_weight          574.30 
  
loop_ 
 _atom_type_symbol 
 _atom_type_description 
 _atom_type_scat_dispersion_real 
 _atom_type_scat_dispersion_imag 
 _atom_type_scat_source 
 'C'  'C'   0.0033   0.0016 
 'International Tables Vol C Tables 4.2.6.8 and 6.1.1.4' 
 'H'  'H'   0.0000   0.0000 
 'International Tables Vol C Tables 4.2.6.8 and 6.1.1.4' 
 'N'  'N'   0.0061   0.0033 
 'International Tables Vol C Tables 4.2.6.8 and 6.1.1.4' 
 'O'  'O'   0.0106   0.0060 
 'International Tables Vol C Tables 4.2.6.8 and 6.1.1.4' 
 'Cl'  'Cl'   0.1484   0.1585 
 'International Tables Vol C Tables 4.2.6.8 and 6.1.1.4' 
 'Rh'  'Rh'  -1.1178   0.9187 
 'International Tables Vol C Tables 4.2.6.8 and 6.1.1.4' 
  
_symmetry_cell_setting            Monoclinic 
_symmetry_space_group_name_H-M    C2/c 
  
loop_ 
 _symmetry_equiv_pos_as_xyz 
 'x, y, z' 
 '-x, y, -z+1/2' 
 'x+1/2, y+1/2, z' 
 '-x+1/2, y+1/2, -z+1/2' 
 '-x, -y, -z' 
 'x, -y, z-1/2' 
 '-x+1/2, -y+1/2, -z' 
 'x+1/2, -y+1/2, z-1/2' 
  
_cell_length_a                    18.234(3) 
_cell_length_b                    15.854(3) 
_cell_length_c                    18.343(4) 
_cell_angle_alpha                 90.00 
_cell_angle_beta                  101.522(4) 
_cell_angle_gamma                 90.00 
_cell_volume                      5195.6(17) 
_cell_formula_units_Z             8 
_cell_measurement_temperature     296(2) 
_cell_measurement_reflns_used     2341 
_cell_measurement_theta_min       2.18 
_cell_measurement_theta_max       21.21 
  
_exptl_crystal_description        prismatic 
_exptl_crystal_colour             yellow 
_exptl_crystal_size_max           0.10 
_exptl_crystal_size_mid           0.08 
_exptl_crystal_size_min           0.05 
_exptl_crystal_density_meas       ? 
_exptl_crystal_density_diffrn     1.468 
_exptl_crystal_density_method     'not measured' 
_exptl_crystal_F_000              2328 
_exptl_absorpt_coefficient_mu     0.886 
_exptl_absorpt_correction_type    none 
_exptl_absorpt_correction_T_min   ? 
_exptl_absorpt_correction_T_max   ? 
_exptl_absorpt_process_details    ? 
  
_exptl_special_details 
; 
 ? 
; 
  
_diffrn_ambient_temperature       296(2) 
_diffrn_radiation_wavelength      0.71073 
_diffrn_radiation_type            MoK\a 
_diffrn_radiation_source          'fine-focus sealed tube' 
_diffrn_radiation_monochromator   graphite 
_diffrn_measurement_device_type   'CCD area detector' 
_diffrn_measurement_method        'phi and omega scans' 
_diffrn_detector_area_resol_mean  ? 
_diffrn_standards_number          ? 
_diffrn_standards_interval_count  ? 
_diffrn_standards_interval_time   ? 
_diffrn_standards_decay_%         ? 
_diffrn_reflns_number             19273 
_diffrn_reflns_av_R_equivalents   0.1386 
_diffrn_reflns_av_sigmaI/netI     0.1472 
_diffrn_reflns_limit_h_min        -21 
_diffrn_reflns_limit_h_max        21 
_diffrn_reflns_limit_k_min        -18 
_diffrn_reflns_limit_k_max        14 
_diffrn_reflns_limit_l_min        -21 
_diffrn_reflns_limit_l_max        21 
_diffrn_reflns_theta_min          1.72 
_diffrn_reflns_theta_max          25.00 
_reflns_number_total              4564 
_reflns_number_gt                 2223 
_reflns_threshold_expression      >2sigma(I) 
  
_computing_data_collection        'Bruker SMART' 
_computing_cell_refinement        'Bruker SMART' 
_computing_data_reduction         'Bruker SAINT' 
_computing_structure_solution     'SHELXS-97 (Sheldrick, 1990)' 
_computing_structure_refinement   'SHELXL-97 (Sheldrick, 1997)' 
_computing_molecular_graphics     'Bruker SHELXTL' 
_computing_publication_material   'Bruker SHELXTL' 
  
_refine_special_details 
; 
 Refinement of F^2^ against ALL reflections.  The weighted R-factor wR and 
 goodness of fit S are based on F^2^, conventional R-factors R are based 
 on F, with F set to zero for negative F^2^. The threshold expression of 
 F^2^ > 2sigma(F^2^) is used only for calculating R-factors(gt) etc. and is 
 not relevant to the choice of reflections for refinement.  R-factors based 
 on F^2^ are statistically about twice as large as those based on F, and R- 
 factors based on ALL data will be even larger. 
; 
  
_refine_ls_structure_factor_coef  Fsqd 
_refine_ls_matrix_type            full 
_refine_ls_weighting_scheme       calc 
_refine_ls_weighting_details 
 'calc w=1/[\s^2^(Fo^2^)+(0.0950P)^2^+0.0000P] where P=(Fo^2^+2Fc^2^)/3' 
_atom_sites_solution_primary      direct 
_atom_sites_solution_secondary    difmap 
_atom_sites_solution_hydrogens    geom 
_refine_ls_hydrogen_treatment     constr 
_refine_ls_extinction_method      none 
_refine_ls_extinction_coef        ? 
_refine_ls_number_reflns          4564 
_refine_ls_number_parameters      298 
_refine_ls_number_restraints      2 
_refine_ls_R_factor_all           0.1519 
_refine_ls_R_factor_gt            0.0599 
_refine_ls_wR_factor_ref          0.1971 
_refine_ls_wR_factor_gt           0.1502 
_refine_ls_goodness_of_fit_ref    0.997 
_refine_ls_restrained_S_all       0.997 
_refine_ls_shift/su_max           0.013 
_refine_ls_shift/su_mean          0.001 
  
loop_ 
 _atom_site_label 
 _atom_site_type_symbol 
 _atom_site_fract_x 
 _atom_site_fract_y 
 _atom_site_fract_z 
 _atom_site_U_iso_or_equiv 
 _atom_site_adp_type 
 _atom_site_occupancy 
 _atom_site_symmetry_multiplicity 
 _atom_site_calc_flag 
 _atom_site_refinement_flags 
 _atom_site_disorder_assembly 
 _atom_site_disorder_group 
Rh1 Rh 0.85286(4) 0.03820(4) 0.89186(4) 0.0375(3) Uani 1 1 d . . . 
Cl1 Cl 0.98903(13) 0.07618(16) 0.89302(14) 0.0506(7) Uani 1 1 d . . . 
N1 N 0.8202(4) 0.0491(4) 0.7811(4) 0.0418(19) Uani 1 1 d . . . 
O1 O 0.7175(4) 0.0010(4) 0.9405(4) 0.0551(18) Uani 1 1 d . . . 
C1 C 0.8802(7) -0.0869(7) 0.8899(7) 0.071(4) Uani 1 1 d . . . 
H1 H 0.9351 -0.0871 0.9016 0.085 Uiso 1 1 calc R . . 
N2 N 0.8363(4) 0.1720(5) 0.9145(4) 0.0415(19) Uani 1 1 d . . . 
N3 N 0.8776(4) 0.0361(5) 1.0074(4) 0.0442(19) Uani 1 1 d . . . 
H3A H 0.8253 0.0042 1.0118 0.053 Uiso 1 1 d . . . 
H3B H 0.9284 -0.0053 1.0185 0.053 Uiso 1 1 d . . . 
C2 C 0.8581(7) -0.1491(6) 0.9481(6) 0.075(4) Uani 1 1 d . . . 
H2A H 0.8160 -0.1272 0.9673 0.090 Uiso 1 1 calc R . . 
H2B H 0.8998 -0.1578 0.9894 0.090 Uiso 1 1 calc R . . 
C3 C 0.8373(9) -0.2304(7) 0.9061(7) 0.083(4) Uani 1 1 d . . . 
H3 H 0.8372 -0.2815 0.9362 0.100 Uiso 1 1 calc R . . 
C4 C 0.7688(11) -0.2122(10) 0.8523(13) 0.149(9) Uani 1 1 d . . . 
H4 H 0.7222 -0.2359 0.8525 0.179 Uiso 1 1 calc R . . 
C5 C 0.7824(19) -0.1597(14) 0.8058(14) 0.225(19) Uani 1 1 d . . . 
H5 H 0.7480 -0.1362 0.7668 0.270 Uiso 1 1 calc R . . 
C6 C 0.8610(14) -0.1429(9) 0.8240(9) 0.130(8) Uani 1 1 d . . . 
H6 H 0.8820 -0.1243 0.7815 0.156 Uiso 1 1 calc R . . 
C7 C 0.8864(12) -0.2306(7) 0.8519(10) 0.152(9) Uani 1 1 d . . . 
H7A H 0.9392 -0.2334 0.8748 0.183 Uiso 1 1 calc R . . 
H7B H 0.8737 -0.2740 0.8142 0.183 Uiso 1 1 calc R . . 
C8 C 0.7502(6) 0.0146(5) 0.8892(5) 0.044(2) Uani 1 1 d . . . 
C9 C 0.7035(5) 0.0220(6) 0.8107(5) 0.043(2) Uani 1 1 d . . . 
C10 C 0.7457(5) 0.0402(6) 0.7563(5) 0.041(2) Uani 1 1 d . . . 
C11 C 0.8623(6) 0.0678(6) 0.7306(5) 0.047(3) Uani 1 1 d . . . 
H11 H 0.9138 0.0725 0.7465 0.057 Uiso 1 1 calc R . . 
C12 C 0.8310(6) 0.0803(6) 0.6553(5) 0.049(3) Uani 1 1 d . . . 
H12 H 0.8615 0.0967 0.6227 0.059 Uiso 1 1 calc R . . 
C13 C 0.7572(6) 0.0688(6) 0.6295(5) 0.049(3) Uani 1 1 d . . . 
H13 H 0.7370 0.0742 0.5790 0.059 Uiso 1 1 calc R . . 
C14 C 0.7107(6) 0.0484(6) 0.6803(5) 0.047(2) Uani 1 1 d . . . 
C15 C 0.6337(6) 0.0364(7) 0.6610(6) 0.064(3) Uani 1 1 d . . . 
H15 H 0.6089 0.0420 0.6117 0.077 Uiso 1 1 calc R . . 
C16 C 0.5949(6) 0.0165(7) 0.7148(6) 0.067(3) Uani 1 1 d . . . 
H16 H 0.5438 0.0064 0.7011 0.081 Uiso 1 1 calc R . . 
C17 C 0.6290(6) 0.0106(7) 0.7893(6) 0.060(3) Uani 1 1 d . . . 
H17 H 0.6003 -0.0012 0.8246 0.072 Uiso 1 1 calc R . . 
C18 C 0.8566(5) 0.1879(6) 0.9888(5) 0.041(2) Uani 1 1 d . . . 
C19 C 0.8794(5) 0.1218(6) 1.0380(5) 0.045(2) Uani 1 1 d . . . 
C20 C 0.9026(6) 0.1372(7) 1.1114(5) 0.054(3) Uani 1 1 d . . . 
H20 H 0.9191 0.0930 1.1439 0.065 Uiso 1 1 calc R . . 
C21 C 0.9017(7) 0.2203(7) 1.1388(6) 0.067(3) Uani 1 1 d . . . 
H21 H 0.9175 0.2308 1.1894 0.080 Uiso 1 1 calc R . . 
C22 C 0.8780(7) 0.2842(8) 1.0921(6) 0.070(3) Uani 1 1 d . . . 
H22 H 0.8774 0.3386 1.1109 0.084 Uiso 1 1 calc R . . 
C23 C 0.8549(6) 0.2710(6) 1.0173(6) 0.056(3) Uani 1 1 d . . . 
C24 C 0.8290(7) 0.3359(6) 0.9648(7) 0.067(3) Uani 1 1 d . . . 
H24 H 0.8262 0.3914 0.9806 0.080 Uiso 1 1 calc R . . 
C25 C 0.8088(7) 0.3163(7) 0.8925(7) 0.070(3) Uani 1 1 d . . . 
H25 H 0.7905 0.3582 0.8581 0.084 Uiso 1 1 calc R . . 
C26 C 0.8149(6) 0.2340(6) 0.8685(6) 0.054(3) Uani 1 1 d . . . 
H26 H 0.8032 0.2227 0.8178 0.065 Uiso 1 1 calc R . . 
Cl2 Cl 0.0128(9) 0.6973(10) 0.2985(7) 0.224 Uiso 0.50 1 d PD . . 
Cl3 Cl 0.0380(10) 0.6030(11) 0.4574(9) 0.260 Uiso 0.50 1 d PD . . 
C27 C 0.037(2) 0.6875(15) 0.3955(8) 0.140 Uiso 0.50 1 d PD . . 
H27A H 0.0874 0.7097 0.4078 0.168 Uiso 0.50 1 calc PR . . 
H27B H 0.0058 0.7294 0.4134 0.168 Uiso 0.50 1 calc PR . . 
  
loop_ 
 _atom_site_aniso_label 
 _atom_site_aniso_U_11 
 _atom_site_aniso_U_22 
 _atom_site_aniso_U_33 
 _atom_site_aniso_U_23 
 _atom_site_aniso_U_13 
 _atom_site_aniso_U_12 
Rh1 0.0378(5) 0.0311(4) 0.0469(4) -0.0001(4) 0.0165(3) -0.0001(4) 
Cl1 0.0374(14) 0.0517(15) 0.0641(16) 0.0114(13) 0.0138(12) -0.0029(12) 
N1 0.033(5) 0.035(5) 0.060(5) 0.001(4) 0.015(4) -0.002(4) 
O1 0.060(5) 0.061(4) 0.053(4) 0.002(4) 0.030(4) 0.001(4) 
C1 0.061(8) 0.059(7) 0.111(10) -0.001(7) 0.057(7) 0.000(6) 
N2 0.046(5) 0.037(5) 0.043(5) 0.008(4) 0.013(4) -0.002(4) 
N3 0.043(5) 0.033(4) 0.059(5) 0.005(4) 0.016(4) 0.008(4) 
C2 0.123(11) 0.035(6) 0.057(7) 0.016(6) -0.002(7) 0.000(7) 
C3 0.128(13) 0.042(7) 0.073(9) 0.007(6) 0.006(9) -0.012(7) 
C4 0.118(14) 0.044(9) 0.24(3) -0.028(12) -0.066(16) -0.016(10) 
C5 0.37(4) 0.066(14) 0.16(2) -0.064(13) -0.15(2) 0.06(2) 
C6 0.29(3) 0.042(9) 0.088(12) 0.002(9) 0.107(15) 0.017(13) 
C7 0.27(2) 0.031(8) 0.214(19) 0.024(10) 0.176(19) 0.034(11) 
C8 0.067(7) 0.026(5) 0.046(6) -0.004(4) 0.025(5) -0.005(5) 
C9 0.037(6) 0.041(6) 0.054(6) -0.001(5) 0.014(5) -0.002(4) 
C10 0.047(6) 0.033(5) 0.044(5) -0.007(5) 0.014(5) 0.003(5) 
C11 0.050(6) 0.046(6) 0.056(6) 0.000(5) 0.034(5) 0.005(5) 
C12 0.055(7) 0.053(6) 0.047(6) -0.003(5) 0.026(5) 0.003(5) 
C13 0.061(8) 0.044(6) 0.041(6) -0.006(5) 0.008(5) 0.011(5) 
C14 0.055(7) 0.034(6) 0.052(6) -0.002(5) 0.011(5) -0.002(5) 
C15 0.051(7) 0.075(8) 0.063(7) 0.000(7) 0.007(6) -0.007(6) 
C16 0.040(6) 0.087(9) 0.071(8) -0.024(7) 0.001(6) -0.013(6) 
C17 0.045(7) 0.082(8) 0.057(7) -0.016(6) 0.021(6) -0.015(6) 
C18 0.046(6) 0.038(6) 0.043(6) -0.003(5) 0.020(5) -0.002(5) 
C19 0.044(6) 0.044(6) 0.049(6) 0.005(5) 0.017(5) -0.003(5) 
C20 0.065(7) 0.056(7) 0.043(6) 0.000(5) 0.018(5) 0.003(6) 
C21 0.086(9) 0.066(8) 0.055(7) -0.013(6) 0.027(6) 0.001(7) 
C22 0.085(9) 0.061(8) 0.067(8) -0.028(7) 0.022(7) -0.001(7) 
C23 0.061(7) 0.049(7) 0.059(7) -0.006(6) 0.017(6) 0.003(5) 
C24 0.089(9) 0.033(6) 0.080(8) -0.005(6) 0.021(7) 0.022(6) 
C25 0.094(9) 0.042(7) 0.074(8) 0.011(6) 0.018(7) 0.015(6) 
C26 0.068(8) 0.043(6) 0.047(6) -0.002(5) 0.003(5) 0.007(5) 
  
_geom_special_details 
; 
 All esds (except the esd in the dihedral angle between two l.s. planes) 
 are estimated using the full covariance matrix.  The cell esds are taken 
 into account individually in the estimation of esds in distances, angles 
 and torsion angles; correlations between esds in cell parameters are only 
 used when they are defined by crystal symmetry.  An approximate (isotropic) 
 treatment of cell esds is used for estimating esds involving l.s. planes. 
; 
  
loop_ 
 _geom_bond_atom_site_label_1 
 _geom_bond_atom_site_label_2 
 _geom_bond_distance 
 _geom_bond_site_symmetry_2 
 _geom_bond_publ_flag 
Rh1 C8 1.899(10) . ? 
Rh1 N1 2.008(7) . ? 
Rh1 C1 2.047(11) . ? 
Rh1 N3 2.078(7) . ? 
Rh1 N2 2.193(7) . ? 
Rh1 Cl1 2.551(3) . ? 
N1 C11 1.347(11) . ? 
N1 C10 1.351(11) . ? 
O1 C8 1.230(10) . ? 
C1 C6 1.484(18) . ? 
C1 C2 1.564(14) . ? 
C1 H1 0.9800 . ? 
N2 C26 1.303(11) . ? 
N2 C18 1.362(11) . ? 
N3 C19 1.467(11) . ? 
N3 H3A 1.0957 . ? 
N3 H3B 1.1206 . ? 
C2 C3 1.510(14) . ? 
C2 H2A 0.9700 . ? 
C2 H2B 0.9700 . ? 
C3 C4 1.46(2) . ? 
C3 C7 1.466(17) . ? 
C3 H3 0.9800 . ? 
C4 C5 1.25(3) . ? 
C4 H4 0.9300 . ? 
C5 C6 1.43(3) . ? 
C5 H5 0.9300 . ? 
C6 C7 1.522(18) . ? 
C6 H6 0.9800 . ? 
C7 H7A 0.9700 . ? 
C7 H7B 0.9700 . ? 
C8 C9 1.524(13) . ? 
C9 C17 1.350(13) . ? 
C9 C10 1.404(13) . ? 
C10 C14 1.418(12) . ? 
C11 C12 1.400(12) . ? 
C11 H11 0.9300 . ? 
C12 C13 1.347(13) . ? 
C12 H12 0.9300 . ? 
C13 C14 1.418(13) . ? 
C13 H13 0.9300 . ? 
C14 C15 1.391(14) . ? 
C15 C16 1.361(15) . ? 
C15 H15 0.9300 . ? 
C16 C17 1.386(14) . ? 
C16 H16 0.9300 . ? 
C17 H17 0.9300 . ? 
C18 C19 1.391(12) . ? 
C18 C23 1.422(13) . ? 
C19 C20 1.351(12) . ? 
C20 C21 1.412(14) . ? 
C20 H20 0.9300 . ? 
C21 C22 1.341(14) . ? 
C21 H21 0.9300 . ? 
C22 C23 1.369(13) . ? 
C22 H22 0.9300 . ? 
C23 C24 1.423(13) . ? 
C24 C25 1.341(14) . ? 
C24 H24 0.9300 . ? 
C25 C26 1.389(13) . ? 
C25 H25 0.9300 . ? 
C26 H26 0.9300 . ? 
Cl2 C27 1.752(5) . ? 
Cl2 Cl2 1.75(2) 2 ? 
Cl3 C27 1.753(5) . ? 
C27 H27A 0.9700 . ? 
C27 H27B 0.9700 . ? 
  
loop_ 
 _geom_angle_atom_site_label_1 
 _geom_angle_atom_site_label_2 
 _geom_angle_atom_site_label_3 
 _geom_angle 
 _geom_angle_site_symmetry_1 
 _geom_angle_site_symmetry_3 
 _geom_angle_publ_flag 
C8 Rh1 N1 84.2(4) . . ? 
C8 Rh1 C1 92.9(4) . . ? 
N1 Rh1 C1 95.2(4) . . ? 
C8 Rh1 N3 92.0(3) . . ? 
N1 Rh1 N3 173.8(3) . . ? 
C1 Rh1 N3 89.9(4) . . ? 
C8 Rh1 N2 91.3(3) . . ? 
N1 Rh1 N2 94.8(3) . . ? 
C1 Rh1 N2 169.5(4) . . ? 
N3 Rh1 N2 80.4(3) . . ? 
C8 Rh1 Cl1 177.5(3) . . ? 
N1 Rh1 Cl1 94.6(2) . . ? 
C1 Rh1 Cl1 89.4(3) . . ? 
N3 Rh1 Cl1 89.0(2) . . ? 
N2 Rh1 Cl1 86.6(2) . . ? 
C11 N1 C10 117.7(8) . . ? 
C11 N1 Rh1 128.3(7) . . ? 
C10 N1 Rh1 113.9(6) . . ? 
C6 C1 C2 97.3(10) . . ? 
C6 C1 Rh1 125.1(10) . . ? 
C2 C1 Rh1 120.1(7) . . ? 
C6 C1 H1 103.9 . . ? 
C2 C1 H1 103.9 . . ? 
Rh1 C1 H1 103.9 . . ? 
C26 N2 C18 119.6(8) . . ? 
C26 N2 Rh1 129.9(7) . . ? 
C18 N2 Rh1 110.3(6) . . ? 
C19 N3 Rh1 111.0(5) . . ? 
C19 N3 H3A 110.7 . . ? 
Rh1 N3 H3A 93.9 . . ? 
C19 N3 H3B 121.2 . . ? 
Rh1 N3 H3B 101.4 . . ? 
H3A N3 H3B 114.6 . . ? 
C1 C2 C3 105.2(9) . . ? 
C1 C2 H2A 110.7 . . ? 
C3 C2 H2A 110.7 . . ? 
C1 C2 H2B 110.7 . . ? 
C3 C2 H2B 110.7 . . ? 
H2A C2 H2B 108.8 . . ? 
C4 C3 C7 95.6(15) . . ? 
C4 C3 C2 105.7(11) . . ? 
C7 C3 C2 102.9(12) . . ? 
C4 C3 H3 116.6 . . ? 
C7 C3 H3 116.6 . . ? 
C2 C3 H3 116.6 . . ? 
C5 C4 C3 110(2) . . ? 
C5 C4 H4 125.2 . . ? 
C3 C4 H4 125.2 . . ? 
C6 C5 C4 106.8(19) . . ? 
C6 C5 H5 126.6 . . ? 
C4 C5 H5 126.6 . . ? 
C5 C6 C1 111.3(16) . . ? 
C5 C6 C7 97.6(16) . . ? 
C1 C6 C7 105.5(14) . . ? 
C5 C6 H6 113.7 . . ? 
C1 C6 H6 113.7 . . ? 
C7 C6 H6 113.7 . . ? 
C6 C7 C3 92.3(11) . . ? 
C6 C7 H7A 113.2 . . ? 
C3 C7 H7A 113.2 . . ? 
C6 C7 H7B 113.2 . . ? 
C3 C7 H7B 113.2 . . ? 
H7A C7 H7B 110.6 . . ? 
O1 C8 C9 118.1(9) . . ? 
O1 C8 Rh1 129.9(8) . . ? 
C9 C8 Rh1 111.8(6) . . ? 
C17 C9 C10 118.9(9) . . ? 
C17 C9 C8 127.2(9) . . ? 
C10 C9 C8 113.9(8) . . ? 
N1 C10 C9 116.1(8) . . ? 
N1 C10 C14 123.0(9) . . ? 
C9 C10 C14 120.9(9) . . ? 
N1 C11 C12 122.3(9) . . ? 
N1 C11 H11 118.9 . . ? 
C12 C11 H11 118.9 . . ? 
C13 C12 C11 120.5(9) . . ? 
C13 C12 H12 119.7 . . ? 
C11 C12 H12 119.7 . . ? 
C12 C13 C14 119.2(9) . . ? 
C12 C13 H13 120.4 . . ? 
C14 C13 H13 120.4 . . ? 
C15 C14 C10 118.1(10) . . ? 
C15 C14 C13 124.7(9) . . ? 
C10 C14 C13 117.1(9) . . ? 
C16 C15 C14 119.4(10) . . ? 
C16 C15 H15 120.3 . . ? 
C14 C15 H15 120.3 . . ? 
C15 C16 C17 122.3(10) . . ? 
C15 C16 H16 118.8 . . ? 
C17 C16 H16 118.8 . . ? 
C9 C17 C16 120.3(10) . . ? 
C9 C17 H17 119.8 . . ? 
C16 C17 H17 119.8 . . ? 
N2 C18 C19 119.7(8) . . ? 
N2 C18 C23 121.2(9) . . ? 
C19 C18 C23 119.0(9) . . ? 
C20 C19 C18 120.3(9) . . ? 
C20 C19 N3 121.8(9) . . ? 
C18 C19 N3 118.0(8) . . ? 
C19 C20 C21 120.0(10) . . ? 
C19 C20 H20 120.0 . . ? 
C21 C20 H20 120.0 . . ? 
C22 C21 C20 120.2(10) . . ? 
C22 C21 H21 119.9 . . ? 
C20 C21 H21 119.9 . . ? 
C23 C22 C21 121.4(11) . . ? 
C23 C22 H22 119.3 . . ? 
C21 C22 H22 119.3 . . ? 
C22 C23 C24 124.2(10) . . ? 
C22 C23 C18 119.0(10) . . ? 
C24 C23 C18 116.8(9) . . ? 
C25 C24 C23 119.3(10) . . ? 
C25 C24 H24 120.3 . . ? 
C23 C24 H24 120.3 . . ? 
C24 C25 C26 120.5(10) . . ? 
C24 C25 H25 119.8 . . ? 
C26 C25 H25 119.8 . . ? 
N2 C26 C25 122.5(10) . . ? 
N2 C26 H26 118.8 . . ? 
C25 C26 H26 118.8 . . ? 
C27 Cl2 Cl2 174.8(10) . 2 ? 
Cl3 C27 Cl2 133.9(16) . . ? 
Cl3 C27 H27A 103.7 . . ? 
Cl2 C27 H27A 103.7 . . ? 
Cl3 C27 H27B 103.7 . . ? 
Cl2 C27 H27B 103.7 . . ? 
H27A C27 H27B 105.4 . . ? 
  
loop_ 
 _geom_torsion_atom_site_label_1 
 _geom_torsion_atom_site_label_2 
 _geom_torsion_atom_site_label_3 
 _geom_torsion_atom_site_label_4 
 _geom_torsion 
 _geom_torsion_site_symmetry_1 
 _geom_torsion_site_symmetry_2 
 _geom_torsion_site_symmetry_3 
 _geom_torsion_site_symmetry_4 
 _geom_torsion_publ_flag 
C8 Rh1 N1 C11 179.7(8) . . . . ? 
C1 Rh1 N1 C11 -87.9(8) . . . . ? 
N3 Rh1 N1 C11 127(3) . . . . ? 
N2 Rh1 N1 C11 88.8(8) . . . . ? 
Cl1 Rh1 N1 C11 1.9(8) . . . . ? 
C8 Rh1 N1 C10 3.2(6) . . . . ? 
C1 Rh1 N1 C10 95.6(7) . . . . ? 
N3 Rh1 N1 C10 -49(3) . . . . ? 
N2 Rh1 N1 C10 -87.7(6) . . . . ? 
Cl1 Rh1 N1 C10 -174.6(6) . . . . ? 
C8 Rh1 C1 C6 73.0(13) . . . . ? 
N1 Rh1 C1 C6 -11.4(13) . . . . ? 
N3 Rh1 C1 C6 165.0(12) . . . . ? 
N2 Rh1 C1 C6 -173.3(17) . . . . ? 
Cl1 Rh1 C1 C6 -106.0(12) . . . . ? 
C8 Rh1 C1 C2 -53.1(10) . . . . ? 
N1 Rh1 C1 C2 -137.5(9) . . . . ? 
N3 Rh1 C1 C2 39.0(9) . . . . ? 
N2 Rh1 C1 C2 61(2) . . . . ? 
Cl1 Rh1 C1 C2 128.0(9) . . . . ? 
C8 Rh1 N2 C26 -86.3(9) . . . . ? 
N1 Rh1 N2 C26 -2.0(9) . . . . ? 
C1 Rh1 N2 C26 159.9(18) . . . . ? 
N3 Rh1 N2 C26 -178.1(9) . . . . ? 
Cl1 Rh1 N2 C26 92.3(9) . . . . ? 
C8 Rh1 N2 C18 97.6(6) . . . . ? 
N1 Rh1 N2 C18 -178.1(6) . . . . ? 
C1 Rh1 N2 C18 -16(2) . . . . ? 
N3 Rh1 N2 C18 5.8(6) . . . . ? 
Cl1 Rh1 N2 C18 -83.8(6) . . . . ? 
C8 Rh1 N3 C19 -97.9(6) . . . . ? 
N1 Rh1 N3 C19 -46(3) . . . . ? 
C1 Rh1 N3 C19 169.2(6) . . . . ? 
N2 Rh1 N3 C19 -6.8(6) . . . . ? 
Cl1 Rh1 N3 C19 79.9(6) . . . . ? 
C6 C1 C2 C3 4.8(15) . . . . ? 
Rh1 C1 C2 C3 143.0(10) . . . . ? 
C1 C2 C3 C4 -67.5(16) . . . . ? 
C1 C2 C3 C7 32.2(14) . . . . ? 
C7 C3 C4 C5 -39(2) . . . . ? 
C2 C3 C4 C5 66(2) . . . . ? 
C3 C4 C5 C6 2(3) . . . . ? 
C4 C5 C6 C1 -76(2) . . . . ? 
C4 C5 C6 C7 34(2) . . . . ? 
C2 C1 C6 C5 65.2(19) . . . . ? 
Rh1 C1 C6 C5 -70.0(18) . . . . ? 
C2 C1 C6 C7 -39.5(16) . . . . ? 
Rh1 C1 C6 C7 -174.7(10) . . . . ? 
C5 C6 C7 C3 -55.2(19) . . . . ? 
C1 C6 C7 C3 59.5(17) . . . . ? 
C4 C3 C7 C6 54.7(14) . . . . ? 
C2 C3 C7 C6 -52.8(16) . . . . ? 
N1 Rh1 C8 O1 -177.4(9) . . . . ? 
C1 Rh1 C8 O1 87.7(9) . . . . ? 
N3 Rh1 C8 O1 -2.3(9) . . . . ? 
N2 Rh1 C8 O1 -82.7(9) . . . . ? 
Cl1 Rh1 C8 O1 -117(6) . . . . ? 
N1 Rh1 C8 C9 -3.3(6) . . . . ? 
C1 Rh1 C8 C9 -98.2(7) . . . . ? 
N3 Rh1 C8 C9 171.8(6) . . . . ? 
N2 Rh1 C8 C9 91.4(6) . . . . ? 
Cl1 Rh1 C8 C9 57(7) . . . . ? 
O1 C8 C9 C17 -4.1(14) . . . . ? 
Rh1 C8 C9 C17 -179.0(9) . . . . ? 
O1 C8 C9 C10 178.0(8) . . . . ? 
Rh1 C8 C9 C10 3.1(10) . . . . ? 
C11 N1 C10 C9 -179.1(8) . . . . ? 
Rh1 N1 C10 C9 -2.2(10) . . . . ? 
C11 N1 C10 C14 1.0(13) . . . . ? 
Rh1 N1 C10 C14 177.9(7) . . . . ? 
C17 C9 C10 N1 -178.6(9) . . . . ? 
C8 C9 C10 N1 -0.6(12) . . . . ? 
C17 C9 C10 C14 1.3(14) . . . . ? 
C8 C9 C10 C14 179.4(8) . . . . ? 
C10 N1 C11 C12 1.8(13) . . . . ? 
Rh1 N1 C11 C12 -174.6(7) . . . . ? 
N1 C11 C12 C13 -4.2(14) . . . . ? 
C11 C12 C13 C14 3.4(14) . . . . ? 
N1 C10 C14 C15 178.8(9) . . . . ? 
C9 C10 C14 C15 -1.1(14) . . . . ? 
N1 C10 C14 C13 -1.6(13) . . . . ? 
C9 C10 C14 C13 178.5(8) . . . . ? 
C12 C13 C14 C15 178.8(10) . . . . ? 
C12 C13 C14 C10 -0.7(13) . . . . ? 
C10 C14 C15 C16 -0.8(15) . . . . ? 
C13 C14 C15 C16 179.6(10) . . . . ? 
C14 C15 C16 C17 2.5(18) . . . . ? 
C10 C9 C17 C16 0.3(15) . . . . ? 
C8 C9 C17 C16 -177.5(9) . . . . ? 
C15 C16 C17 C9 -2.2(18) . . . . ? 
C26 N2 C18 C19 179.9(9) . . . . ? 
Rh1 N2 C18 C19 -3.5(11) . . . . ? 
C26 N2 C18 C23 0.0(14) . . . . ? 
Rh1 N2 C18 C23 176.6(7) . . . . ? 
N2 C18 C19 C20 177.3(9) . . . . ? 
C23 C18 C19 C20 -2.8(14) . . . . ? 
N2 C18 C19 N3 -2.5(13) . . . . ? 
C23 C18 C19 N3 177.4(8) . . . . ? 
Rh1 N3 C19 C20 -172.4(8) . . . . ? 
Rh1 N3 C19 C18 7.5(10) . . . . ? 
C18 C19 C20 C21 1.8(15) . . . . ? 
N3 C19 C20 C21 -178.3(9) . . . . ? 
C19 C20 C21 C22 -0.2(17) . . . . ? 
C20 C21 C22 C23 -0.5(18) . . . . ? 
C21 C22 C23 C24 179.8(11) . . . . ? 
C21 C22 C23 C18 -0.5(17) . . . . ? 
N2 C18 C23 C22 -178.0(10) . . . . ? 
C19 C18 C23 C22 2.1(15) . . . . ? 
N2 C18 C23 C24 1.7(15) . . . . ? 
C19 C18 C23 C24 -178.2(10) . . . . ? 
C22 C23 C24 C25 178.9(12) . . . . ? 
C18 C23 C24 C25 -0.8(17) . . . . ? 
C23 C24 C25 C26 -1.8(19) . . . . ? 
C18 N2 C26 C25 -2.8(16) . . . . ? 
Rh1 N2 C26 C25 -178.6(8) . . . . ? 
C24 C25 C26 N2 3.7(19) . . . . ? 
Cl2 Cl2 C27 Cl3 -1(24) 2 . . . ? 
  
loop_ 
 _geom_hbond_atom_site_label_D 
 _geom_hbond_atom_site_label_H 
 _geom_hbond_atom_site_label_A 
 _geom_hbond_distance_DH 
 _geom_hbond_distance_HA 
 _geom_hbond_distance_DA 
 _geom_hbond_angle_DHA 
 _geom_hbond_site_symmetry_A 
N3 H3A O1  1.10 2.13 2.984(10) 132.4 . 
N3 H3B Cl1  1.12 2.28 3.262(7) 145.4 5_757 
  
_diffrn_measured_fraction_theta_max    0.994 
_diffrn_reflns_theta_full              25.00 
_diffrn_measured_fraction_theta_full   0.994 
_refine_diff_density_max    1.002 
_refine_diff_density_min   -0.846 
_refine_diff_density_rms    0.128 


#======================================================END                                    

  
data_[C20H12ClN2O2Rh]2_complex_10   
  
_audit_creation_method            SHELXL-97 
_chemical_name_systematic 
; 
 ? 
; 
_chemical_name_common             ? 
_chemical_melting_point           ? 
_chemical_formula_moiety          ? 
_chemical_formula_sum 
 'C40 H24 Cl2 N4 O4 Rh2' 
_chemical_formula_weight          901.35 
  
loop_ 
 _atom_type_symbol 
 _atom_type_description 
 _atom_type_scat_dispersion_real 
 _atom_type_scat_dispersion_imag 
 _atom_type_scat_source 
 'C'  'C'   0.0033   0.0016 
 'International Tables Vol C Tables 4.2.6.8 and 6.1.1.4' 
 'H'  'H'   0.0000   0.0000 
 'International Tables Vol C Tables 4.2.6.8 and 6.1.1.4' 
 'N'  'N'   0.0061   0.0033 
 'International Tables Vol C Tables 4.2.6.8 and 6.1.1.4' 
 'O'  'O'   0.0106   0.0060 
 'International Tables Vol C Tables 4.2.6.8 and 6.1.1.4' 
 'Cl'  'Cl'   0.1484   0.1585 
 'International Tables Vol C Tables 4.2.6.8 and 6.1.1.4' 
 'Rh'  'Rh'  -1.1178   0.9187 
 'International Tables Vol C Tables 4.2.6.8 and 6.1.1.4' 
  
_symmetry_cell_setting            Orthorhombic 
_symmetry_space_group_name_H-M    Aba2 
  
loop_ 
 _symmetry_equiv_pos_as_xyz 
 'x, y, z' 
 '-x, -y, z' 
 'x+1/2, -y+1/2, z' 
 '-x+1/2, y+1/2, z' 
 'x, y+1/2, z+1/2' 
 '-x, -y+1/2, z+1/2' 
 'x+1/2, -y+1, z+1/2' 
 '-x+1/2, y+1, z+1/2' 
  
_cell_length_a                    12.0204(12) 
_cell_length_b                    15.1043(15) 
_cell_length_c                    22.451(2) 
_cell_angle_alpha                 90.00 
_cell_angle_beta                  90.00 
_cell_angle_gamma                 90.00 
_cell_volume                      4076.1(7) 
_cell_formula_units_Z             4 
_cell_measurement_temperature     296(2) 
_cell_measurement_reflns_used     ? 
_cell_measurement_theta_min       ? 
_cell_measurement_theta_max       ? 
  
_exptl_crystal_description        prismatic 
_exptl_crystal_colour             yellow 
_exptl_crystal_size_max           0.20 
_exptl_crystal_size_mid           0.20 
_exptl_crystal_size_min           0.11 
_exptl_crystal_density_meas       ? 
_exptl_crystal_density_diffrn     1.469 
_exptl_crystal_density_method     'not measured' 
_exptl_crystal_F_000              1792 
_exptl_absorpt_coefficient_mu     0.983 
_exptl_absorpt_correction_type    none 
_exptl_absorpt_correction_T_min   ? 
_exptl_absorpt_correction_T_max   ? 
_exptl_absorpt_process_details    ? 
  
_exptl_special_details 
; 
 ? 
; 
  
_diffrn_ambient_temperature       296(2) 
_diffrn_radiation_wavelength      0.71073 
_diffrn_radiation_type            MoK\a 
_diffrn_radiation_source          'fine-focus sealed tube' 
_diffrn_radiation_monochromator   graphite 
_diffrn_measurement_device_type   'CCD area detector' 
_diffrn_measurement_method        'phi and omega scans' 
_diffrn_detector_area_resol_mean  ? 
_diffrn_standards_number          ? 
_diffrn_standards_interval_count  ? 
_diffrn_standards_interval_time   ? 
_diffrn_standards_decay_%         ? 
_diffrn_reflns_number             10284 
_diffrn_reflns_av_R_equivalents   0.0812 
_diffrn_reflns_av_sigmaI/netI     0.0894 
_diffrn_reflns_limit_h_min        -14 
_diffrn_reflns_limit_h_max        13 
_diffrn_reflns_limit_k_min        -17 
_diffrn_reflns_limit_k_max        15 
_diffrn_reflns_limit_l_min        -16 
_diffrn_reflns_limit_l_max        26 
_diffrn_reflns_theta_min          2.35 
_diffrn_reflns_theta_max          25.00 
_reflns_number_total              3019 
_reflns_number_gt                 1535 
_reflns_threshold_expression      >2sigma(I) 
  
_computing_data_collection        'Bruker SMART' 
_computing_cell_refinement        'Bruker SMART' 
_computing_data_reduction         'Bruker SHELXTL' 
_computing_structure_solution     'SHELXS-97 (Sheldrick, 1990)' 
_computing_structure_refinement   'SHELXL-97 (Sheldrick, 1997)' 
_computing_molecular_graphics     'Bruker SHELXTL' 
_computing_publication_material   'Bruker SHELXTL' 
  
_refine_special_details 
; 
 In the last cycles of refinement some unidentificated, disordered and 
only partially occupied solvent molecules were found, the largest five 
first peaks in the final difference map correspond to a solvent which 
could not be properly modelled.  

Refinement of F^2^ against ALL reflections.  The weighted R-factor wR and 
 goodness of fit S are based on F^2^, conventional R-factors R are based 
 on F, with F set to zero for negative F^2^. The threshold expression of 
 F^2^ > 2sigma(F^2^) is used only for calculating R-factors(gt) etc. and is 
 not relevant to the choice of reflections for refinement.  R-factors based 
 on F^2^ are statistically about twice as large as those based on F, and R- 
 factors based on ALL data will be even larger. 
; 
  
_refine_ls_structure_factor_coef  Fsqd 
_refine_ls_matrix_type            full 
_refine_ls_weighting_scheme       calc 
_refine_ls_weighting_details 
 'calc w=1/[\s^2^(Fo^2^)+(0.1100P)^2^+0.0000P] where P=(Fo^2^+2Fc^2^)/3' 
_atom_sites_solution_primary      direct 
_atom_sites_solution_secondary    difmap 
_atom_sites_solution_hydrogens    geom 
_refine_ls_hydrogen_treatment     constr 
_refine_ls_extinction_method      none 
_refine_ls_extinction_coef        ? 
_refine_ls_abs_structure_details 
 'Flack H D (1983), Acta Cryst. A39, 876-881' 
_refine_ls_abs_structure_Flack    -0.02(18) 
_refine_ls_number_reflns          3019 
_refine_ls_number_parameters      236 
_refine_ls_number_restraints      1 
_refine_ls_R_factor_all           0.1236 
_refine_ls_R_factor_gt            0.0627 
_refine_ls_wR_factor_ref          0.2030 
_refine_ls_wR_factor_gt           0.1691 
_refine_ls_goodness_of_fit_ref    0.972 
_refine_ls_restrained_S_all       0.972 
_refine_ls_shift/su_max           0.028 
_refine_ls_shift/su_mean          0.003 
  
loop_ 
 _atom_site_label 
 _atom_site_type_symbol 
 _atom_site_fract_x 
 _atom_site_fract_y 
 _atom_site_fract_z 
 _atom_site_U_iso_or_equiv 
 _atom_site_adp_type 
 _atom_site_occupancy 
 _atom_site_symmetry_multiplicity 
 _atom_site_calc_flag 
 _atom_site_refinement_flags 
 _atom_site_disorder_assembly 
 _atom_site_disorder_group 
Rh1 Rh 0.0000 0.5000 0.49451(6) 0.0536(7) Uani 1 2 d S . . 
Rh2 Rh 0.0000 0.5000 0.32613(5) 0.0526(7) Uani 1 2 d S . . 
Cl1 Cl 0.1265(3) 0.5585(2) 0.4102(4) 0.0628(8) Uani 1 1 d . . . 
N1 N 0.0828(17) 0.3791(13) 0.5019(10) 0.084(7) Uani 1 1 d . . . 
N2 N 0.0854(13) 0.3840(10) 0.3217(8) 0.064(5) Uani 1 1 d . . . 
O1 O -0.1778(18) 0.4727(14) 0.5776(7) 0.110(6) Uani 1 1 d . . . 
O2 O 0.1081(12) 0.5993(10) 0.2345(6) 0.083(4) Uani 1 1 d . . . 
C8 C -0.095(3) 0.4497(19) 0.5570(10) 0.079(7) Uani 1 1 d . . . 
C9 C -0.052(2) 0.3552(16) 0.5721(9) 0.081(6) Uani 1 1 d . . . 
C10 C 0.040(2) 0.3286(14) 0.5431(11) 0.089(7) Uani 1 1 d . . . 
C11 C 0.177(2) 0.3618(15) 0.4751(11) 0.101(7) Uani 1 1 d . . . 
H11 H 0.2097 0.4031 0.4498 0.121 Uiso 1 1 calc R . . 
C12 C 0.2271(19) 0.279(2) 0.4853(15) 0.134(10) Uani 1 1 d . . . 
H12 H 0.2893 0.2628 0.4635 0.160 Uiso 1 1 calc R . . 
C13 C 0.186(4) 0.225(2) 0.526(2) 0.16(2) Uani 1 1 d . . . 
H13 H 0.2231 0.1726 0.5349 0.198 Uiso 1 1 calc R . . 
C14 C 0.089(3) 0.244(2) 0.5567(15) 0.124(11) Uani 1 1 d . . . 
C15 C 0.034(3) 0.195(2) 0.6046(18) 0.16(2) Uani 1 1 d . . . 
H15 H 0.0713 0.1448 0.6184 0.186 Uiso 1 1 calc R . . 
C16 C -0.045(4) 0.211(4) 0.626(2) 0.19(2) Uani 1 1 d . . . 
H16 H -0.0819 0.1701 0.6500 0.232 Uiso 1 1 calc R . . 
C17 C -0.089(2) 0.2988(19) 0.6141(10) 0.121(9) Uani 1 1 d . . . 
H17 H -0.1477 0.3178 0.6377 0.145 Uiso 1 1 calc R . . 
C18 C 0.104(2) 0.5324(18) 0.2639(11) 0.075(7) Uani 1 1 d . . . 
C19 C 0.1811(17) 0.4575(15) 0.2493(8) 0.069(5) Uani 1 1 d . . . 
C20 C 0.1660(16) 0.3825(10) 0.2799(8) 0.068(5) Uani 1 1 d . . . 
C21 C 0.0604(16) 0.3073(12) 0.3511(8) 0.076(5) Uani 1 1 d . . . 
H21 H 0.0003 0.3065 0.3772 0.091 Uiso 1 1 calc R . . 
C22 C 0.124(2) 0.2287(12) 0.3429(10) 0.108(8) Uani 1 1 d . . . 
H22 H 0.1056 0.1776 0.3638 0.129 Uiso 1 1 calc R . . 
C23 C 0.204(3) 0.2285(15) 0.3075(13) 0.121(11) Uani 1 1 d . . . 
H23 H 0.2476 0.1779 0.3046 0.145 Uiso 1 1 calc R . . 
C24 C 0.2315(17) 0.3060(14) 0.2701(9) 0.089(6) Uani 1 1 d . . . 
C25 C 0.312(2) 0.3117(16) 0.2271(12) 0.135(10) Uani 1 1 d . . . 
H25 H 0.3578 0.2637 0.2194 0.162 Uiso 1 1 calc R . . 
C26 C 0.323(2) 0.3858(18) 0.1966(11) 0.152(12) Uani 1 1 d . . . 
H26 H 0.3783 0.3884 0.1676 0.183 Uiso 1 1 calc R . . 
C27 C 0.256(3) 0.4614(15) 0.2056(10) 0.121(8) Uani 1 1 d . . . 
H27 H 0.2635 0.5117 0.1821 0.146 Uiso 1 1 calc R . . 
  
loop_ 
 _atom_site_aniso_label 
 _atom_site_aniso_U_11 
 _atom_site_aniso_U_22 
 _atom_site_aniso_U_33 
 _atom_site_aniso_U_23 
 _atom_site_aniso_U_13 
 _atom_site_aniso_U_12 
Rh1 0.0669(17) 0.0535(16) 0.0406(17) 0.000 0.000 -0.0025(12) 
Rh2 0.084(2) 0.0366(12) 0.0374(16) 0.000 0.000 -0.0036(12) 
Cl1 0.0701(19) 0.069(2) 0.0495(17) 0.001(3) -0.001(4) -0.0091(17) 
N1 0.091(16) 0.063(14) 0.098(19) 0.007(12) -0.047(13) -0.003(12) 
N2 0.089(14) 0.058(11) 0.046(10) 0.008(8) 0.001(9) -0.007(10) 
O1 0.119(14) 0.112(15) 0.099(13) 0.001(10) 0.033(11) -0.012(12) 
O2 0.119(11) 0.066(9) 0.064(9) 0.010(7) -0.005(7) 0.002(8) 
C8 0.11(2) 0.084(19) 0.039(13) 0.012(12) -0.028(13) -0.006(16) 
C9 0.089(15) 0.097(18) 0.056(14) 0.021(12) -0.015(12) -0.035(14) 
C10 0.129(19) 0.063(14) 0.076(16) 0.027(12) -0.053(14) -0.020(13) 
C11 0.112(18) 0.080(16) 0.111(19) 0.030(12) -0.056(16) 0.002(14) 
C12 0.078(17) 0.17(3) 0.15(3) -0.02(3) -0.019(16) 0.032(18) 
C13 0.19(4) 0.11(3) 0.20(4) 0.11(3) -0.11(3) -0.06(3) 
C14 0.13(2) 0.09(2) 0.15(3) 0.001(19) -0.08(2) -0.01(2) 
C15 0.21(4) 0.09(2) 0.17(3) 0.11(2) -0.12(3) -0.08(2) 
C16 0.22(5) 0.19(4) 0.16(4) 0.04(3) -0.11(4) -0.11(4) 
C17 0.17(2) 0.12(2) 0.079(18) 0.020(15) -0.054(16) -0.052(19) 
C18 0.10(2) 0.063(13) 0.062(15) 0.002(11) -0.008(13) -0.018(13) 
C19 0.088(14) 0.059(13) 0.061(12) -0.002(10) 0.024(10) 0.007(13) 
C20 0.100(13) 0.040(10) 0.065(12) -0.008(8) 0.017(11) 0.002(9) 
C21 0.104(13) 0.059(12) 0.064(12) -0.002(9) 0.027(10) -0.001(11) 
C22 0.16(2) 0.043(12) 0.122(19) 0.019(11) 0.062(17) 0.024(13) 
C23 0.18(3) 0.044(14) 0.14(3) 0.005(13) 0.06(2) 0.045(15) 
C24 0.109(17) 0.079(15) 0.080(14) 0.001(11) 0.042(12) 0.018(12) 
C25 0.18(3) 0.086(18) 0.14(2) -0.010(16) 0.09(2) 0.031(18) 
C26 0.21(3) 0.11(2) 0.14(2) 0.015(17) 0.11(2) 0.05(2) 
C27 0.20(3) 0.067(13) 0.096(16) -0.005(13) 0.020(19) 0.014(17) 
  
_geom_special_details 
; 
 All esds (except the esd in the dihedral angle between two l.s. planes) 
 are estimated using the full covariance matrix.  The cell esds are taken 
 into account individually in the estimation of esds in distances, angles 
 and torsion angles; correlations between esds in cell parameters are only 
 used when they are defined by crystal symmetry.  An approximate (isotropic) 
 treatment of cell esds is used for estimating esds involving l.s. planes. 
; 
  
loop_ 
 _geom_bond_atom_site_label_1 
 _geom_bond_atom_site_label_2 
 _geom_bond_distance 
 _geom_bond_site_symmetry_2 
 _geom_bond_publ_flag 
Rh1 C8 1.96(3) 2_565 ? 
Rh1 C8 1.96(3) . ? 
Rh1 N1 2.09(2) 2_565 ? 
Rh1 N1 2.09(2) . ? 
Rh1 Cl1 2.584(7) 2_565 ? 
Rh1 Cl1 2.584(7) . ? 
Rh2 C18 1.94(3) . ? 
Rh2 C18 1.94(3) 2_565 ? 
Rh2 N2 2.033(16) . ? 
Rh2 N2 2.033(16) 2_565 ? 
Rh2 Cl1 2.579(7) . ? 
Rh2 Cl1 2.579(7) 2_565 ? 
N1 C11 1.31(3) . ? 
N1 C10 1.31(3) . ? 
N2 C20 1.35(2) . ? 
N2 C21 1.37(2) . ? 
O1 C8 1.15(3) . ? 
O2 C18 1.21(3) . ? 
C8 C9 1.55(3) . ? 
C9 C10 1.35(3) . ? 
C9 C17 1.34(3) . ? 
C10 C14 1.44(3) . ? 
C11 C12 1.40(3) . ? 
C11 H11 0.9300 . ? 
C12 C13 1.33(4) . ? 
C12 H12 0.9300 . ? 
C13 C14 1.38(5) . ? 
C13 H13 0.9300 . ? 
C14 C15 1.46(4) . ? 
C15 C16 1.09(6) . ? 
C15 H15 0.9300 . ? 
C16 C17 1.46(5) . ? 
C16 H16 0.9300 . ? 
C17 H17 0.9300 . ? 
C18 C19 1.50(3) . ? 
C19 C27 1.33(3) . ? 
C19 C20 1.34(2) . ? 
C20 C24 1.42(2) . ? 
C21 C22 1.42(3) . ? 
C21 H21 0.9300 . ? 
C22 C23 1.25(3) . ? 
C22 H22 0.9300 . ? 
C23 C24 1.48(3) . ? 
C23 H23 0.9300 . ? 
C24 C25 1.37(3) . ? 
C25 C26 1.32(3) . ? 
C25 H25 0.9300 . ? 
C26 C27 1.41(3) . ? 
C26 H26 0.9300 . ? 
C27 H27 0.9300 . ? 
  
loop_ 
 _geom_angle_atom_site_label_1 
 _geom_angle_atom_site_label_2 
 _geom_angle_atom_site_label_3 
 _geom_angle 
 _geom_angle_site_symmetry_1 
 _geom_angle_site_symmetry_3 
 _geom_angle_publ_flag 
C8 Rh1 C8 88.6(14) 2_565 . ? 
C8 Rh1 N1 83.2(11) 2_565 2_565 ? 
C8 Rh1 N1 90.3(10) . 2_565 ? 
C8 Rh1 N1 90.3(10) 2_565 . ? 
C8 Rh1 N1 83.2(11) . . ? 
N1 Rh1 N1 170.9(13) 2_565 . ? 
C8 Rh1 Cl1 177.2(9) 2_565 2_565 ? 
C8 Rh1 Cl1 92.9(7) . 2_565 ? 
N1 Rh1 Cl1 94.4(7) 2_565 2_565 ? 
N1 Rh1 Cl1 92.3(5) . 2_565 ? 
C8 Rh1 Cl1 92.9(7) 2_565 . ? 
C8 Rh1 Cl1 177.2(9) . . ? 
N1 Rh1 Cl1 92.3(5) 2_565 . ? 
N1 Rh1 Cl1 94.4(7) . . ? 
Cl1 Rh1 Cl1 85.8(3) 2_565 . ? 
C18 Rh2 C18 87.9(15) . 2_565 ? 
C18 Rh2 N2 81.7(9) . . ? 
C18 Rh2 N2 94.2(9) 2_565 . ? 
C18 Rh2 N2 94.2(9) . 2_565 ? 
C18 Rh2 N2 81.7(9) 2_565 2_565 ? 
N2 Rh2 N2 174.3(11) . 2_565 ? 
C18 Rh2 Cl1 93.4(7) . . ? 
C18 Rh2 Cl1 173.9(8) 2_565 . ? 
N2 Rh2 Cl1 91.9(5) . . ? 
N2 Rh2 Cl1 92.2(5) 2_565 . ? 
C18 Rh2 Cl1 173.9(8) . 2_565 ? 
C18 Rh2 Cl1 93.4(7) 2_565 2_565 ? 
N2 Rh2 Cl1 92.2(5) . 2_565 ? 
N2 Rh2 Cl1 91.9(5) 2_565 2_565 ? 
Cl1 Rh2 Cl1 86.0(3) . 2_565 ? 
Rh1 Cl1 Rh2 94.13(10) . . ? 
C11 N1 C10 124(2) . . ? 
C11 N1 Rh1 123.4(18) . . ? 
C10 N1 Rh1 112.2(18) . . ? 
C20 N2 C21 118.7(17) . . ? 
C20 N2 Rh2 114.3(12) . . ? 
C21 N2 Rh2 126.5(14) . . ? 
O1 C8 C9 118(3) . . ? 
O1 C8 Rh1 132(2) . . ? 
C9 C8 Rh1 108.8(18) . . ? 
C10 C9 C17 115(3) . . ? 
C10 C9 C8 116(2) . . ? 
C17 C9 C8 129(3) . . ? 
C9 C10 N1 120(2) . . ? 
C9 C10 C14 120(3) . . ? 
N1 C10 C14 120(3) . . ? 
N1 C11 C12 118(2) . . ? 
N1 C11 H11 120.9 . . ? 
C12 C11 H11 120.9 . . ? 
C13 C12 C11 120(3) . . ? 
C13 C12 H12 120.0 . . ? 
C11 C12 H12 119.9 . . ? 
C14 C13 C12 122(4) . . ? 
C14 C13 H13 119.1 . . ? 
C12 C13 H13 119.1 . . ? 
C13 C14 C15 129(3) . . ? 
C13 C14 C10 115(3) . . ? 
C15 C14 C10 115(3) . . ? 
C16 C15 C14 127(4) . . ? 
C16 C15 H15 116.4 . . ? 
C14 C15 H15 116.5 . . ? 
C15 C16 C17 116(5) . . ? 
C15 C16 H16 122.2 . . ? 
C17 C16 H16 122.1 . . ? 
C9 C17 C16 126(4) . . ? 
C9 C17 H17 117.0 . . ? 
C16 C17 H17 117.0 . . ? 
O2 C18 C19 119(2) . . ? 
O2 C18 Rh2 129(2) . . ? 
C19 C18 Rh2 111.4(16) . . ? 
C27 C19 C20 120(2) . . ? 
C27 C19 C18 123(2) . . ? 
C20 C19 C18 116.4(18) . . ? 
N2 C20 C19 116.1(17) . . ? 
N2 C20 C24 121.4(16) . . ? 
C19 C20 C24 122.4(17) . . ? 
N2 C21 C22 121.7(18) . . ? 
N2 C21 H21 119.1 . . ? 
C22 C21 H21 119.1 . . ? 
C23 C22 C21 119.9(18) . . ? 
C23 C22 H22 120.1 . . ? 
C21 C22 H22 120.1 . . ? 
C22 C23 C24 122(2) . . ? 
C22 C23 H23 118.9 . . ? 
C24 C23 H23 118.9 . . ? 
C20 C24 C25 116.7(19) . . ? 
C20 C24 C23 115.7(17) . . ? 
C25 C24 C23 128(2) . . ? 
C26 C25 C24 120(2) . . ? 
C26 C25 H25 120.1 . . ? 
C24 C25 H25 120.2 . . ? 
C25 C26 C27 123(2) . . ? 
C25 C26 H26 118.3 . . ? 
C27 C26 H26 118.3 . . ? 
C19 C27 C26 117(2) . . ? 
C19 C27 H27 121.4 . . ? 
C26 C27 H27 121.4 . . ? 
  
loop_ 
 _geom_torsion_atom_site_label_1 
 _geom_torsion_atom_site_label_2 
 _geom_torsion_atom_site_label_3 
 _geom_torsion_atom_site_label_4 
 _geom_torsion 
 _geom_torsion_site_symmetry_1 
 _geom_torsion_site_symmetry_2 
 _geom_torsion_site_symmetry_3 
 _geom_torsion_site_symmetry_4 
 _geom_torsion_publ_flag 
C8 Rh1 Cl1 Rh2 -177.5(9) 2_565 . . . ? 
C8 Rh1 Cl1 Rh2 61(16) . . . . ? 
N1 Rh1 Cl1 Rh2 -94.2(7) 2_565 . . . ? 
N1 Rh1 Cl1 Rh2 92.0(5) . . . . ? 
Cl1 Rh1 Cl1 Rh2 -0.001(1) 2_565 . . . ? 
C18 Rh2 Cl1 Rh1 -173.9(8) . . . . ? 
C18 Rh2 Cl1 Rh1 84(8) 2_565 . . . ? 
N2 Rh2 Cl1 Rh1 -92.1(5) . . . . ? 
N2 Rh2 Cl1 Rh1 91.8(5) 2_565 . . . ? 
Cl1 Rh2 Cl1 Rh1 0.0 2_565 . . . ? 
C8 Rh1 N1 C11 -83.2(19) 2_565 . . . ? 
C8 Rh1 N1 C11 -171.8(19) . . . . ? 
N1 Rh1 N1 C11 -127.3(18) 2_565 . . . ? 
Cl1 Rh1 N1 C11 95.6(18) 2_565 . . . ? 
Cl1 Rh1 N1 C11 9.7(19) . . . . ? 
C8 Rh1 N1 C10 86.8(16) 2_565 . . . ? 
C8 Rh1 N1 C10 -1.8(15) . . . . ? 
N1 Rh1 N1 C10 42.7(14) 2_565 . . . ? 
Cl1 Rh1 N1 C10 -94.4(14) 2_565 . . . ? 
Cl1 Rh1 N1 C10 179.6(14) . . . . ? 
C18 Rh2 N2 C20 -1.7(15) . . . . ? 
C18 Rh2 N2 C20 85.5(15) 2_565 . . . ? 
N2 Rh2 N2 C20 42.1(13) 2_565 . . . ? 
Cl1 Rh2 N2 C20 -94.9(13) . . . . ? 
Cl1 Rh2 N2 C20 179.1(13) 2_565 . . . ? 
C18 Rh2 N2 C21 -173.5(18) . . . . ? 
C18 Rh2 N2 C21 -86.3(19) 2_565 . . . ? 
N2 Rh2 N2 C21 -129.7(16) 2_565 . . . ? 
Cl1 Rh2 N2 C21 93.3(16) . . . . ? 
Cl1 Rh2 N2 C21 7.3(17) 2_565 . . . ? 
C8 Rh1 C8 O1 99(3) 2_565 . . . ? 
N1 Rh1 C8 O1 16(3) 2_565 . . . ? 
N1 Rh1 C8 O1 -171(3) . . . . ? 
Cl1 Rh1 C8 O1 -79(3) 2_565 . . . ? 
Cl1 Rh1 C8 O1 -140(14) . . . . ? 
C8 Rh1 C8 C9 -91.0(16) 2_565 . . . ? 
N1 Rh1 C8 C9 -174.2(14) 2_565 . . . ? 
N1 Rh1 C8 C9 -0.5(14) . . . . ? 
Cl1 Rh1 C8 C9 91.4(13) 2_565 . . . ? 
Cl1 Rh1 C8 C9 30(17) . . . . ? 
O1 C8 C9 C10 174(2) . . . . ? 
Rh1 C8 C9 C10 3(2) . . . . ? 
O1 C8 C9 C17 -12(3) . . . . ? 
Rh1 C8 C9 C17 176.4(18) . . . . ? 
C17 C9 C10 N1 -179.3(19) . . . . ? 
C8 C9 C10 N1 -5(3) . . . . ? 
C17 C9 C10 C14 2(3) . . . . ? 
C8 C9 C10 C14 176.5(18) . . . . ? 
C11 N1 C10 C9 174(2) . . . . ? 
Rh1 N1 C10 C9 4(2) . . . . ? 
C11 N1 C10 C14 -7(3) . . . . ? 
Rh1 N1 C10 C14 -177.1(16) . . . . ? 
C10 N1 C11 C12 9(3) . . . . ? 
Rh1 N1 C11 C12 177.4(17) . . . . ? 
N1 C11 C12 C13 -7(4) . . . . ? 
C11 C12 C13 C14 5(5) . . . . ? 
C12 C13 C14 C15 -177(3) . . . . ? 
C12 C13 C14 C10 -3(5) . . . . ? 
C9 C10 C14 C13 -177(3) . . . . ? 
N1 C10 C14 C13 4(4) . . . . ? 
C9 C10 C14 C15 -3(3) . . . . ? 
N1 C10 C14 C15 179(2) . . . . ? 
C13 C14 C15 C16 -177(6) . . . . ? 
C10 C14 C15 C16 10(7) . . . . ? 
C14 C15 C16 C17 -14(9) . . . . ? 
C10 C9 C17 C16 -6(4) . . . . ? 
C8 C9 C17 C16 180(3) . . . . ? 
C15 C16 C17 C9 13(7) . . . . ? 
C18 Rh2 C18 O2 80(2) 2_565 . . . ? 
N2 Rh2 C18 O2 175(3) . . . . ? 
N2 Rh2 C18 O2 -1(3) 2_565 . . . ? 
Cl1 Rh2 C18 O2 -94(2) . . . . ? 
Cl1 Rh2 C18 O2 -178(6) 2_565 . . . ? 
C18 Rh2 C18 C19 -93.9(17) 2_565 . . . ? 
N2 Rh2 C18 C19 0.7(15) . . . . ? 
N2 Rh2 C18 C19 -175.4(15) 2_565 . . . ? 
Cl1 Rh2 C18 C19 92.1(15) . . . . ? 
Cl1 Rh2 C18 C19 8(9) 2_565 . . . ? 
O2 C18 C19 C27 1(4) . . . . ? 
Rh2 C18 C19 C27 176(2) . . . . ? 
O2 C18 C19 C20 -174(2) . . . . ? 
Rh2 C18 C19 C20 0(2) . . . . ? 
C21 N2 C20 C19 174.9(18) . . . . ? 
Rh2 N2 C20 C19 2(2) . . . . ? 
C21 N2 C20 C24 -6(3) . . . . ? 
Rh2 N2 C20 C24 -178.5(14) . . . . ? 
C27 C19 C20 N2 -177(2) . . . . ? 
C18 C19 C20 N2 -2(3) . . . . ? 
C27 C19 C20 C24 3(3) . . . . ? 
C18 C19 C20 C24 179(2) . . . . ? 
C20 N2 C21 C22 6(3) . . . . ? 
Rh2 N2 C21 C22 177.6(17) . . . . ? 
N2 C21 C22 C23 -1(4) . . . . ? 
C21 C22 C23 C24 -4(5) . . . . ? 
N2 C20 C24 C25 -179(2) . . . . ? 
C19 C20 C24 C25 0(3) . . . . ? 
N2 C20 C24 C23 1(3) . . . . ? 
C19 C20 C24 C23 -180(2) . . . . ? 
C22 C23 C24 C20 4(5) . . . . ? 
C22 C23 C24 C25 -175(3) . . . . ? 
C20 C24 C25 C26 -1(4) . . . . ? 
C23 C24 C25 C26 178(3) . . . . ? 
C24 C25 C26 C27 0(5) . . . . ? 
C20 C19 C27 C26 -5(4) . . . . ? 
C18 C19 C27 C26 -180(2) . . . . ? 
C25 C26 C27 C19 3(5) . . . . ? 
  
_diffrn_measured_fraction_theta_max    0.999 
_diffrn_reflns_theta_full              25.00 
_diffrn_measured_fraction_theta_full   0.999 
_refine_diff_density_max    1.588 
_refine_diff_density_min   -0.471 
_refine_diff_density_rms    0.220 

#=================================================END                                   

  
data_[C35H30ClN1O1P1Rh]_complex_14      
  
_audit_creation_method            SHELXL-97 
_chemical_name_systematic 
; 
 ? 
; 
_chemical_name_common             ? 
_chemical_melting_point           ? 
_chemical_formula_moiety          ? 
_chemical_formula_sum 
 'C36 H31 Cl4 N O P Rh' 
_chemical_formula_weight          769.30 
  
loop_ 
 _atom_type_symbol 
 _atom_type_description 
 _atom_type_scat_dispersion_real 
 _atom_type_scat_dispersion_imag 
 _atom_type_scat_source 
 'C'  'C'   0.0033   0.0016 
 'International Tables Vol C Tables 4.2.6.8 and 6.1.1.4' 
 'H'  'H'   0.0000   0.0000 
 'International Tables Vol C Tables 4.2.6.8 and 6.1.1.4' 
 'N'  'N'   0.0061   0.0033 
 'International Tables Vol C Tables 4.2.6.8 and 6.1.1.4' 
 'O'  'O'   0.0106   0.0060 
 'International Tables Vol C Tables 4.2.6.8 and 6.1.1.4' 
 'P'  'P'   0.1023   0.0942 
 'International Tables Vol C Tables 4.2.6.8 and 6.1.1.4' 
 'Cl'  'Cl'   0.1484   0.1585 
 'International Tables Vol C Tables 4.2.6.8 and 6.1.1.4' 
 'Rh'  'Rh'  -1.1178   0.9187 
 'International Tables Vol C Tables 4.2.6.8 and 6.1.1.4' 
  
_symmetry_cell_setting            Monoclinic 
_symmetry_space_group_name_H-M    P2(1)/n 
  
loop_ 
 _symmetry_equiv_pos_as_xyz 
 'x, y, z' 
 '-x+1/2, y+1/2, -z+1/2' 
 '-x, -y, -z' 
 'x-1/2, -y-1/2, z-1/2' 
  
_cell_length_a                    16.267(2) 
_cell_length_b                    10.0715(13) 
_cell_length_c                    20.465(2) 
_cell_angle_alpha                 90.00 
_cell_angle_beta                  91.694(3) 
_cell_angle_gamma                 90.00 
_cell_volume                      3351.4(7) 
_cell_formula_units_Z             4 
_cell_measurement_temperature     296(2) 
_cell_measurement_reflns_used     ? 
_cell_measurement_theta_min       ? 
_cell_measurement_theta_max       ? 
  
_exptl_crystal_description        prismatic 
_exptl_crystal_colour             yellow 
_exptl_crystal_size_max           0.14 
_exptl_crystal_size_mid           0.10 
_exptl_crystal_size_min           0.06 
_exptl_crystal_density_meas       ? 
_exptl_crystal_density_diffrn     1.525 
_exptl_crystal_density_method     'not measured' 
_exptl_crystal_F_000              1560 
_exptl_absorpt_coefficient_mu     0.907 
_exptl_absorpt_correction_type    none 
_exptl_absorpt_correction_T_min   ? 
_exptl_absorpt_correction_T_max   ? 
_exptl_absorpt_process_details    ? 
  
_exptl_special_details 
; 
 ? 
; 
  
_diffrn_ambient_temperature       296(2) 
_diffrn_radiation_wavelength      0.71073 
_diffrn_radiation_type            MoK\a 
_diffrn_radiation_source          'fine-focus sealed tube' 
_diffrn_radiation_monochromator   graphite 
_diffrn_measurement_device_type   'CCD area detector' 
_diffrn_measurement_method        'phi and omega scans' 
_diffrn_detector_area_resol_mean  ? 
_diffrn_standards_number          ? 
_diffrn_standards_interval_count  ? 
_diffrn_standards_interval_time   ? 
_diffrn_standards_decay_%         ? 
_diffrn_reflns_number             17211 
_diffrn_reflns_av_R_equivalents   0.1115 
_diffrn_reflns_av_sigmaI/netI     0.1690 
_diffrn_reflns_limit_h_min        -16 
_diffrn_reflns_limit_h_max        19 
_diffrn_reflns_limit_k_min        -11 
_diffrn_reflns_limit_k_max        11 
_diffrn_reflns_limit_l_min        -17 
_diffrn_reflns_limit_l_max        24 
_diffrn_reflns_theta_min          1.58 
_diffrn_reflns_theta_max          25.00 
_reflns_number_total              5893 
_reflns_number_gt                 2749 
_reflns_threshold_expression      >2sigma(I) 
  
_computing_data_collection        'Bruker SMART' 
_computing_cell_refinement        'Bruker SMART' 
_computing_data_reduction         'Bruker SHELXTL' 
_computing_structure_solution     'SHELXS-97 (Sheldrick, 1990)' 
_computing_structure_refinement   'SHELXL-97 (Sheldrick, 1997)' 
_computing_molecular_graphics     'Bruker SHELXTL' 
_computing_publication_material   'Bruker SHELXTL' 
  
_refine_special_details 
; 
 Refinement of F^2^ against ALL reflections.  The weighted R-factor wR and 
 goodness of fit S are based on F^2^, conventional R-factors R are based 
 on F, with F set to zero for negative F^2^. The threshold expression of 
 F^2^ > 2sigma(F^2^) is used only for calculating R-factors(gt) etc. and is 
 not relevant to the choice of reflections for refinement.  R-factors based 
 on F^2^ are statistically about twice as large as those based on F, and R- 
 factors based on ALL data will be even larger. 
; 
  
_refine_ls_structure_factor_coef  Fsqd 
_refine_ls_matrix_type            full 
_refine_ls_weighting_scheme       calc 
_refine_ls_weighting_details 
 'calc w=1/[\s^2^(Fo^2^)+(0.0733P)^2^+0.0000P] where P=(Fo^2^+2Fc^2^)/3' 
_atom_sites_solution_primary      direct 
_atom_sites_solution_secondary    difmap 
_atom_sites_solution_hydrogens    geom 
_refine_ls_hydrogen_treatment     constr 
_refine_ls_extinction_method      none 
_refine_ls_extinction_coef        ? 
_refine_ls_number_reflns          5893 
_refine_ls_number_parameters      377 
_refine_ls_number_restraints      0 
_refine_ls_R_factor_all           0.1480 
_refine_ls_R_factor_gt            0.0687 
_refine_ls_wR_factor_ref          0.1944 
_refine_ls_wR_factor_gt           0.1658 
_refine_ls_goodness_of_fit_ref    0.992 
_refine_ls_restrained_S_all       0.992 
_refine_ls_shift/su_max           0.013 
_refine_ls_shift/su_mean          0.001 
  
loop_ 
 _atom_site_label 
 _atom_site_type_symbol 
 _atom_site_fract_x 
 _atom_site_fract_y 
 _atom_site_fract_z 
 _atom_site_U_iso_or_equiv 
 _atom_site_adp_type 
 _atom_site_occupancy 
 _atom_site_symmetry_multiplicity 
 _atom_site_calc_flag 
 _atom_site_refinement_flags 
 _atom_site_disorder_assembly 
 _atom_site_disorder_group 
Rh1 Rh 0.67927(5) 0.29924(7) 0.56276(3) 0.0341(3) Uani 1 1 d . . . 
Cl1 Cl 0.63687(16) 0.3880(3) 0.45660(11) 0.0509(7) Uani 1 1 d . . . 
P1 P 0.81396(16) 0.3505(2) 0.54104(11) 0.0352(6) Uani 1 1 d . . . 
N1 N 0.5567(5) 0.2466(7) 0.5721(3) 0.0382(19) Uani 1 1 d . . . 
O1 O 0.7631(4) 0.0535(6) 0.5782(3) 0.0487(17) Uani 1 1 d . . . 
C1 C 0.7023(5) 0.3047(9) 0.6635(4) 0.040(2) Uani 1 1 d . . . 
H1A H 0.7508 0.2512 0.6755 0.048 Uiso 1 1 calc R . . 
C2 C 0.6313(7) 0.2709(12) 0.7067(5) 0.067(3) Uani 1 1 d . . . 
H2A H 0.6043 0.1839 0.7062 0.080 Uiso 1 1 calc R . . 
C3 C 0.5834(8) 0.4045(16) 0.7159(7) 0.092(5) Uani 1 1 d . . . 
H3A H 0.5239 0.4077 0.7218 0.111 Uiso 1 1 calc R . . 
C4 C 0.6425(9) 0.3531(15) 0.7675(6) 0.099(5) Uani 1 1 d . . . 
H4A H 0.6237 0.3220 0.8099 0.119 Uiso 1 1 calc R . . 
C5 C 0.7196(8) 0.4333(12) 0.7618(5) 0.078(4) Uani 1 1 d . . . 
H5A H 0.7684 0.3850 0.7763 0.093 Uiso 1 1 calc R . . 
H5B H 0.7168 0.5179 0.7844 0.093 Uiso 1 1 calc R . . 
C6 C 0.7131(7) 0.4479(11) 0.6878(5) 0.058(3) Uani 1 1 d . . . 
H6A H 0.7578 0.4977 0.6682 0.069 Uiso 1 1 calc R . . 
C7 C 0.6283(8) 0.5078(12) 0.6782(6) 0.081(4) Uani 1 1 d . . . 
H7A H 0.6242 0.5954 0.6975 0.097 Uiso 1 1 calc R . . 
H7B H 0.6105 0.5108 0.6325 0.097 Uiso 1 1 calc R . . 
C11 C 0.4893(6) 0.3219(10) 0.5653(4) 0.051(3) Uani 1 1 d . . . 
H11A H 0.4951 0.4123 0.5575 0.062 Uiso 1 1 calc R . . 
C12 C 0.4092(6) 0.2679(12) 0.5696(5) 0.057(3) Uani 1 1 d . . . 
H12A H 0.3635 0.3231 0.5660 0.068 Uiso 1 1 calc R . . 
C13 C 0.3992(7) 0.1358(12) 0.5790(5) 0.060(3) Uani 1 1 d . . . 
H13A H 0.3467 0.1002 0.5816 0.072 Uiso 1 1 calc R . . 
C14 C 0.4684(6) 0.0529(10) 0.5847(4) 0.045(3) Uani 1 1 d . . . 
C15 C 0.4654(7) -0.0854(10) 0.5926(5) 0.054(3) Uani 1 1 d . . . 
H15A H 0.4146 -0.1275 0.5944 0.065 Uiso 1 1 calc R . . 
C16 C 0.5337(7) -0.1571(10) 0.5975(5) 0.052(3) Uani 1 1 d . . . 
H16A H 0.5302 -0.2484 0.6036 0.063 Uiso 1 1 calc R . . 
C17 C 0.6120(7) -0.0961(9) 0.5937(4) 0.048(3) Uani 1 1 d . . . 
H17A H 0.6595 -0.1472 0.5979 0.058 Uiso 1 1 calc R . . 
C9 C 0.6177(6) 0.0380(9) 0.5837(4) 0.035(2) Uani 1 1 d . . . 
C10 C 0.5452(6) 0.1143(9) 0.5805(4) 0.037(2) Uani 1 1 d . . . 
C18 C 0.8613(6) 0.2394(9) 0.4831(4) 0.041(2) Uani 1 1 d . . . 
C19 C 0.8145(7) 0.1853(9) 0.4334(5) 0.051(3) Uani 1 1 d . . . 
H19A H 0.7578 0.1974 0.4318 0.061 Uiso 1 1 calc R . . 
C20 C 0.8530(9) 0.1104(11) 0.3840(5) 0.068(3) Uani 1 1 d . . . 
H20A H 0.8208 0.0749 0.3500 0.082 Uiso 1 1 calc R . . 
C21 C 0.9334(9) 0.0898(12) 0.3849(6) 0.075(4) Uani 1 1 d . . . 
H21A H 0.9574 0.0407 0.3520 0.090 Uiso 1 1 calc R . . 
C22 C 0.9801(8) 0.1413(13) 0.4345(6) 0.082(4) Uani 1 1 d . . . 
H22A H 1.0364 0.1248 0.4360 0.099 Uiso 1 1 calc R . . 
C23 C 0.9459(7) 0.2191(11) 0.4838(5) 0.062(3) Uani 1 1 d . . . 
H23A H 0.9795 0.2565 0.5165 0.074 Uiso 1 1 calc R . . 
C24 C 0.8889(6) 0.3590(10) 0.6084(4) 0.045(3) Uani 1 1 d . . . 
C25 C 0.9078(6) 0.2450(11) 0.6445(5) 0.057(3) Uani 1 1 d . . . 
H25A H 0.8870 0.1632 0.6309 0.068 Uiso 1 1 calc R . . 
C26 C 0.9565(7) 0.2529(14) 0.6995(6) 0.076(4) Uani 1 1 d . . . 
H26A H 0.9692 0.1763 0.7231 0.091 Uiso 1 1 calc R . . 
C27 C 0.9877(7) 0.3755(17) 0.7209(5) 0.081(4) Uani 1 1 d . . . 
H27A H 1.0187 0.3804 0.7598 0.097 Uiso 1 1 calc R . . 
C28 C 0.9730(7) 0.4878(13) 0.6852(6) 0.071(4) Uani 1 1 d . . . 
H28A H 0.9960 0.5686 0.6979 0.085 Uiso 1 1 calc R . . 
C29 C 0.9228(6) 0.4780(11) 0.6296(5) 0.059(3) Uani 1 1 d . . . 
H29A H 0.9114 0.5545 0.6056 0.071 Uiso 1 1 calc R . . 
C30 C 0.8227(5) 0.5122(9) 0.5026(4) 0.039(2) Uani 1 1 d . . . 
C31 C 0.7858(6) 0.6212(9) 0.5308(5) 0.048(3) Uani 1 1 d . . . 
H31A H 0.7545 0.6092 0.5677 0.058 Uiso 1 1 calc R . . 
C32 C 0.7946(6) 0.7492(10) 0.5050(6) 0.061(3) Uani 1 1 d . . . 
H32A H 0.7718 0.8223 0.5255 0.073 Uiso 1 1 calc R . . 
C33 C 0.8369(7) 0.7640(12) 0.4498(6) 0.068(4) Uani 1 1 d . . . 
H33A H 0.8424 0.8483 0.4319 0.082 Uiso 1 1 calc R . . 
C34 C 0.8719(8) 0.6584(11) 0.4195(6) 0.070(4) Uani 1 1 d . . . 
H34A H 0.8996 0.6700 0.3808 0.084 Uiso 1 1 calc R . . 
C35 C 0.8656(6) 0.5338(10) 0.4472(5) 0.054(3) Uani 1 1 d . . . 
H35A H 0.8913 0.4624 0.4274 0.064 Uiso 1 1 calc R . . 
C8 C 0.6978(6) 0.1114(9) 0.5767(4) 0.037(2) Uani 1 1 d . . . 
C36 C 0.7245(9) 0.4284(15) 0.3075(7) 0.118(5) Uiso 1 1 d . . . 
H36A H 0.7346 0.4077 0.3539 0.141 Uiso 1 1 calc R . . 
Cl2 Cl 0.8143(4) 0.4262(6) 0.2639(3) 0.174(2) Uiso 1 1 d . . . 
Cl3 Cl 0.6585(4) 0.3161(7) 0.2702(3) 0.211(3) Uiso 1 1 d . . . 
Cl4 Cl 0.6802(4) 0.5867(7) 0.2964(3) 0.194(2) Uiso 1 1 d . . . 
  
loop_ 
 _atom_site_aniso_label 
 _atom_site_aniso_U_11 
 _atom_site_aniso_U_22 
 _atom_site_aniso_U_33 
 _atom_site_aniso_U_23 
 _atom_site_aniso_U_13 
 _atom_site_aniso_U_12 
Rh1 0.0384(5) 0.0292(4) 0.0348(4) 0.0007(4) 0.0023(3) -0.0003(4) 
Cl1 0.0518(17) 0.0531(16) 0.0474(16) 0.0140(12) -0.0070(13) -0.0059(13) 
P1 0.0409(16) 0.0299(13) 0.0347(14) 0.0005(11) 0.0008(12) 0.0013(12) 
N1 0.046(5) 0.029(4) 0.039(5) 0.005(3) -0.001(4) 0.004(4) 
O1 0.049(5) 0.036(4) 0.061(5) -0.002(3) 0.007(4) 0.004(4) 
C1 0.037(6) 0.048(6) 0.035(5) -0.002(5) -0.003(4) 0.004(5) 
C2 0.071(9) 0.088(10) 0.043(7) -0.001(6) 0.011(6) -0.023(7) 
C3 0.046(8) 0.136(14) 0.096(11) -0.060(10) 0.020(8) -0.003(9) 
C4 0.104(12) 0.154(14) 0.040(8) -0.036(8) 0.034(8) -0.043(11) 
C5 0.092(10) 0.091(10) 0.051(8) -0.028(7) 0.012(7) -0.013(8) 
C6 0.067(8) 0.063(8) 0.044(7) -0.016(5) 0.013(6) -0.013(6) 
C7 0.085(11) 0.066(9) 0.092(10) -0.035(7) 0.009(8) 0.021(8) 
C11 0.050(7) 0.054(7) 0.050(7) 0.011(5) -0.004(5) 0.000(6) 
C12 0.032(7) 0.064(8) 0.074(8) -0.002(6) 0.002(5) 0.011(6) 
C13 0.043(7) 0.070(9) 0.068(8) 0.004(6) 0.009(6) -0.017(7) 
C14 0.041(7) 0.049(7) 0.045(6) -0.005(5) 0.003(5) -0.008(6) 
C15 0.060(8) 0.045(7) 0.058(7) 0.007(5) 0.006(6) -0.018(6) 
C16 0.069(8) 0.029(6) 0.058(7) 0.011(5) -0.003(6) -0.012(6) 
C17 0.060(7) 0.030(6) 0.055(7) 0.005(5) 0.002(5) 0.000(5) 
C9 0.036(6) 0.039(6) 0.031(5) 0.006(4) 0.009(4) -0.013(5) 
C10 0.049(7) 0.035(6) 0.026(5) 0.000(4) -0.001(5) -0.007(5) 
C18 0.051(7) 0.037(6) 0.034(6) -0.003(4) 0.001(5) -0.004(5) 
C19 0.061(7) 0.040(6) 0.052(7) 0.000(5) 0.009(6) 0.005(6) 
C20 0.099(11) 0.057(8) 0.049(7) -0.015(6) 0.016(7) -0.006(8) 
C21 0.094(11) 0.064(9) 0.071(9) 0.003(7) 0.050(8) 0.029(8) 
C22 0.072(10) 0.097(11) 0.079(10) -0.017(8) 0.021(8) 0.005(8) 
C23 0.058(8) 0.064(8) 0.064(8) -0.012(6) 0.014(6) 0.005(7) 
C24 0.045(7) 0.054(7) 0.037(6) -0.003(5) 0.008(5) 0.009(5) 
C25 0.046(7) 0.072(8) 0.051(7) 0.015(6) 0.001(6) -0.005(6) 
C26 0.045(8) 0.121(12) 0.060(8) 0.046(8) -0.003(6) -0.008(8) 
C27 0.045(8) 0.166(15) 0.032(7) -0.006(8) -0.008(6) -0.008(9) 
C28 0.056(8) 0.085(10) 0.071(9) -0.026(7) -0.017(7) 0.009(7) 
C29 0.059(8) 0.059(8) 0.059(7) -0.010(6) -0.011(6) 0.017(6) 
C30 0.027(6) 0.036(6) 0.054(6) -0.004(5) 0.002(5) 0.000(5) 
C31 0.049(7) 0.039(6) 0.056(7) 0.008(5) 0.009(5) -0.002(5) 
C32 0.041(7) 0.044(6) 0.097(9) 0.002(6) 0.016(7) 0.000(5) 
C33 0.049(8) 0.055(8) 0.101(10) 0.031(7) 0.006(7) -0.015(6) 
C34 0.083(10) 0.053(8) 0.076(9) 0.025(6) 0.026(7) 0.002(7) 
C35 0.058(7) 0.042(7) 0.061(7) -0.002(5) 0.005(6) -0.005(6) 
C8 0.050(7) 0.038(6) 0.024(5) -0.001(4) 0.010(5) 0.008(5) 
  
_geom_special_details 
; 
 All esds (except the esd in the dihedral angle between two l.s. planes) 
 are estimated using the full covariance matrix.  The cell esds are taken 
 into account individually in the estimation of esds in distances, angles 
 and torsion angles; correlations between esds in cell parameters are only 
 used when they are defined by crystal symmetry.  An approximate (isotropic) 
 treatment of cell esds is used for estimating esds involving l.s. planes. 
; 
  
loop_ 
 _geom_bond_atom_site_label_1 
 _geom_bond_atom_site_label_2 
 _geom_bond_distance 
 _geom_bond_site_symmetry_2 
 _geom_bond_publ_flag 
Rh1 C8 1.936(9) . ? 
Rh1 N1 2.078(8) . ? 
Rh1 C1 2.086(8) . ? 
Rh1 P1 2.307(3) . ? 
Rh1 Cl1 2.430(2) . ? 
P1 C30 1.816(9) . ? 
P1 C24 1.815(10) . ? 
P1 C18 1.818(9) . ? 
N1 C11 1.337(11) . ? 
N1 C10 1.357(11) . ? 
O1 C8 1.212(10) . ? 
C1 C2 1.514(12) . ? 
C1 C6 1.533(12) . ? 
C1 H1A 0.9800 . ? 
C2 C4 1.502(15) . ? 
C2 C3 1.568(17) . ? 
C2 H2A 0.9800 . ? 
C3 C7 1.497(16) . ? 
C3 C4 1.500(18) . ? 
C3 H3A 0.9800 . ? 
C4 C5 1.499(15) . ? 
C4 H4A 0.9800 . ? 
C5 C6 1.523(12) . ? 
C5 H5A 0.9700 . ? 
C5 H5B 0.9700 . ? 
C6 C7 1.513(14) . ? 
C6 H6A 0.9800 . ? 
C7 H7A 0.9700 . ? 
C7 H7B 0.9700 . ? 
C11 C12 1.417(13) . ? 
C11 H11A 0.9300 . ? 
C12 C13 1.354(13) . ? 
C12 H12A 0.9300 . ? 
C13 C14 1.404(13) . ? 
C13 H13A 0.9300 . ? 
C14 C10 1.399(12) . ? 
C14 C15 1.403(13) . ? 
C15 C16 1.326(13) . ? 
C15 H15A 0.9300 . ? 
C16 C17 1.419(13) . ? 
C16 H16A 0.9300 . ? 
C17 C9 1.370(11) . ? 
C17 H17A 0.9300 . ? 
C9 C10 1.407(12) . ? 
C9 C8 1.508(12) . ? 
C18 C23 1.393(13) . ? 
C18 C19 1.366(12) . ? 
C19 C20 1.421(13) . ? 
C19 H19A 0.9300 . ? 
C20 C21 1.323(15) . ? 
C20 H20A 0.9300 . ? 
C21 C22 1.354(16) . ? 
C21 H21A 0.9300 . ? 
C22 C23 1.404(14) . ? 
C22 H22A 0.9300 . ? 
C23 H23A 0.9300 . ? 
C24 C29 1.384(13) . ? 
C24 C25 1.394(13) . ? 
C25 C26 1.359(14) . ? 
C25 H25A 0.9300 . ? 
C26 C27 1.401(17) . ? 
C26 H26A 0.9300 . ? 
C27 C28 1.364(16) . ? 
C27 H27A 0.9300 . ? 
C28 C29 1.384(13) . ? 
C28 H28A 0.9300 . ? 
C29 H29A 0.9300 . ? 
C30 C35 1.367(12) . ? 
C30 C31 1.385(12) . ? 
C31 C32 1.403(13) . ? 
C31 H31A 0.9300 . ? 
C32 C33 1.349(13) . ? 
C32 H32A 0.9300 . ? 
C33 C34 1.364(14) . ? 
C33 H33A 0.9300 . ? 
C34 C35 1.381(13) . ? 
C34 H34A 0.9300 . ? 
C35 H35A 0.9300 . ? 
C36 Cl3 1.722(15) . ? 
C36 Cl2 1.736(15) . ? 
C36 Cl4 1.762(15) . ? 
C36 H36A 0.9800 . ? 
  
loop_ 
 _geom_angle_atom_site_label_1 
 _geom_angle_atom_site_label_2 
 _geom_angle_atom_site_label_3 
 _geom_angle 
 _geom_angle_site_symmetry_1 
 _geom_angle_site_symmetry_3 
 _geom_angle_publ_flag 
C8 Rh1 N1 83.3(4) . . ? 
C8 Rh1 C1 81.8(3) . . ? 
N1 Rh1 C1 93.5(3) . . ? 
C8 Rh1 P1 95.9(3) . . ? 
N1 Rh1 P1 174.0(2) . . ? 
C1 Rh1 P1 92.3(3) . . ? 
C8 Rh1 Cl1 122.0(3) . . ? 
N1 Rh1 Cl1 85.9(2) . . ? 
C1 Rh1 Cl1 155.8(3) . . ? 
P1 Rh1 Cl1 89.51(9) . . ? 
C30 P1 C24 103.1(5) . . ? 
C30 P1 C18 103.3(4) . . ? 
C24 P1 C18 103.7(4) . . ? 
C30 P1 Rh1 111.8(3) . . ? 
C24 P1 Rh1 119.0(3) . . ? 
C18 P1 Rh1 114.2(3) . . ? 
C11 N1 C10 117.0(9) . . ? 
C11 N1 Rh1 129.2(7) . . ? 
C10 N1 Rh1 113.5(6) . . ? 
C2 C1 C6 96.0(8) . . ? 
C2 C1 Rh1 116.9(6) . . ? 
C6 C1 Rh1 111.2(6) . . ? 
C2 C1 H1A 110.7 . . ? 
C6 C1 H1A 110.7 . . ? 
Rh1 C1 H1A 110.7 . . ? 
C4 C2 C1 106.4(9) . . ? 
C4 C2 C3 58.4(8) . . ? 
C1 C2 C3 105.5(10) . . ? 
C4 C2 H2A 123.0 . . ? 
C1 C2 H2A 123.0 . . ? 
C3 C2 H2A 123.0 . . ? 
C7 C3 C4 106.9(11) . . ? 
C7 C3 C2 106.5(9) . . ? 
C4 C3 C2 58.6(8) . . ? 
C7 C3 H3A 122.6 . . ? 
C4 C3 H3A 122.6 . . ? 
C2 C3 H3A 122.6 . . ? 
C5 C4 C2 108.3(9) . . ? 
C5 C4 C3 106.2(12) . . ? 
C2 C4 C3 63.0(8) . . ? 
C5 C4 H4A 121.6 . . ? 
C2 C4 H4A 121.6 . . ? 
C3 C4 H4A 121.6 . . ? 
C4 C5 C6 95.5(9) . . ? 
C4 C5 H5A 112.6 . . ? 
C6 C5 H5A 112.6 . . ? 
C4 C5 H5B 112.7 . . ? 
C6 C5 H5B 112.6 . . ? 
H5A C5 H5B 110.1 . . ? 
C7 C6 C5 101.8(9) . . ? 
C7 C6 C1 103.8(9) . . ? 
C5 C6 C1 103.6(8) . . ? 
C7 C6 H6A 115.3 . . ? 
C5 C6 H6A 115.3 . . ? 
C1 C6 H6A 115.3 . . ? 
C3 C7 C6 96.4(10) . . ? 
C3 C7 H7A 112.5 . . ? 
C6 C7 H7A 112.5 . . ? 
C3 C7 H7B 112.5 . . ? 
C6 C7 H7B 112.5 . . ? 
H7A C7 H7B 110.0 . . ? 
N1 C11 C12 121.9(10) . . ? 
N1 C11 H11A 119.1 . . ? 
C12 C11 H11A 119.1 . . ? 
C13 C12 C11 120.0(10) . . ? 
C13 C12 H12A 120.0 . . ? 
C11 C12 H12A 120.0 . . ? 
C12 C13 C14 119.8(10) . . ? 
C12 C13 H13A 120.1 . . ? 
C14 C13 H13A 120.1 . . ? 
C10 C14 C15 118.7(10) . . ? 
C10 C14 C13 116.5(9) . . ? 
C15 C14 C13 124.7(10) . . ? 
C16 C15 C14 121.1(10) . . ? 
C16 C15 H15A 119.4 . . ? 
C14 C15 H15A 119.4 . . ? 
C15 C16 C17 120.8(9) . . ? 
C15 C16 H16A 119.6 . . ? 
C17 C16 H16A 119.6 . . ? 
C9 C17 C16 119.9(10) . . ? 
C9 C17 H17A 120.0 . . ? 
C16 C17 H17A 120.0 . . ? 
C17 C9 C10 119.0(9) . . ? 
C17 C9 C8 124.0(9) . . ? 
C10 C9 C8 117.0(8) . . ? 
N1 C10 C14 124.7(9) . . ? 
N1 C10 C9 115.1(8) . . ? 
C14 C10 C9 120.3(9) . . ? 
C23 C18 C19 118.5(9) . . ? 
C23 C18 P1 121.4(8) . . ? 
C19 C18 P1 119.7(8) . . ? 
C18 C19 C20 119.6(11) . . ? 
C18 C19 H19A 120.2 . . ? 
C20 C19 H19A 120.2 . . ? 
C21 C20 C19 121.9(12) . . ? 
C21 C20 H20A 119.0 . . ? 
C19 C20 H20A 119.0 . . ? 
C20 C21 C22 118.9(11) . . ? 
C20 C21 H21A 120.6 . . ? 
C22 C21 H21A 120.6 . . ? 
C21 C22 C23 121.8(12) . . ? 
C21 C22 H22A 119.1 . . ? 
C23 C22 H22A 119.1 . . ? 
C18 C23 C22 119.2(11) . . ? 
C18 C23 H23A 120.4 . . ? 
C22 C23 H23A 120.4 . . ? 
C29 C24 C25 117.8(10) . . ? 
C29 C24 P1 122.1(8) . . ? 
C25 C24 P1 119.8(8) . . ? 
C26 C25 C24 120.3(11) . . ? 
C26 C25 H25A 119.8 . . ? 
C24 C25 H25A 119.8 . . ? 
C25 C26 C27 120.5(11) . . ? 
C25 C26 H26A 119.7 . . ? 
C27 C26 H26A 119.7 . . ? 
C28 C27 C26 120.4(11) . . ? 
C28 C27 H27A 119.8 . . ? 
C26 C27 H27A 119.8 . . ? 
C29 C28 C27 118.1(12) . . ? 
C29 C28 H28A 120.9 . . ? 
C27 C28 H28A 120.9 . . ? 
C28 C29 C24 122.7(11) . . ? 
C28 C29 H29A 118.7 . . ? 
C24 C29 H29A 118.7 . . ? 
C35 C30 C31 117.3(9) . . ? 
C35 C30 P1 123.4(7) . . ? 
C31 C30 P1 119.3(7) . . ? 
C32 C31 C30 121.4(9) . . ? 
C32 C31 H31A 119.3 . . ? 
C30 C31 H31A 119.3 . . ? 
C33 C32 C31 118.5(10) . . ? 
C33 C32 H32A 120.7 . . ? 
C31 C32 H32A 120.7 . . ? 
C32 C33 C34 121.6(10) . . ? 
C32 C33 H33A 119.2 . . ? 
C34 C33 H33A 119.2 . . ? 
C33 C34 C35 119.0(10) . . ? 
C33 C34 H34A 120.5 . . ? 
C35 C34 H34A 120.5 . . ? 
C30 C35 C34 122.0(10) . . ? 
C30 C35 H35A 119.0 . . ? 
C34 C35 H35A 119.0 . . ? 
O1 C8 C9 121.4(9) . . ? 
O1 C8 Rh1 127.3(7) . . ? 
C9 C8 Rh1 111.2(7) . . ? 
Cl3 C36 Cl2 106.7(9) . . ? 
Cl3 C36 Cl4 106.8(9) . . ? 
Cl2 C36 Cl4 107.0(9) . . ? 
Cl3 C36 H36A 112.0 . . ? 
Cl2 C36 H36A 112.0 . . ? 
Cl4 C36 H36A 112.0 . . ? 
  
loop_ 
 _geom_torsion_atom_site_label_1 
 _geom_torsion_atom_site_label_2 
 _geom_torsion_atom_site_label_3 
 _geom_torsion_atom_site_label_4 
 _geom_torsion 
 _geom_torsion_site_symmetry_1 
 _geom_torsion_site_symmetry_2 
 _geom_torsion_site_symmetry_3 
 _geom_torsion_site_symmetry_4 
 _geom_torsion_publ_flag 
C8 Rh1 P1 C30 164.1(4) . . . . ? 
N1 Rh1 P1 C30 83(2) . . . . ? 
C1 Rh1 P1 C30 -113.9(4) . . . . ? 
Cl1 Rh1 P1 C30 42.0(3) . . . . ? 
C8 Rh1 P1 C24 -75.8(5) . . . . ? 
N1 Rh1 P1 C24 -157(2) . . . . ? 
C1 Rh1 P1 C24 6.2(5) . . . . ? 
Cl1 Rh1 P1 C24 162.1(4) . . . . ? 
C8 Rh1 P1 C18 47.3(4) . . . . ? 
N1 Rh1 P1 C18 -34(2) . . . . ? 
C1 Rh1 P1 C18 129.3(4) . . . . ? 
Cl1 Rh1 P1 C18 -74.8(3) . . . . ? 
C8 Rh1 N1 C11 -175.7(8) . . . . ? 
C1 Rh1 N1 C11 103.0(8) . . . . ? 
P1 Rh1 N1 C11 -94(2) . . . . ? 
Cl1 Rh1 N1 C11 -52.8(8) . . . . ? 
C8 Rh1 N1 C10 -2.3(6) . . . . ? 
C1 Rh1 N1 C10 -83.6(6) . . . . ? 
P1 Rh1 N1 C10 80(2) . . . . ? 
Cl1 Rh1 N1 C10 120.6(6) . . . . ? 
C8 Rh1 C1 C2 -82.0(8) . . . . ? 
N1 Rh1 C1 C2 0.7(8) . . . . ? 
P1 Rh1 C1 C2 -177.6(8) . . . . ? 
Cl1 Rh1 C1 C2 88.5(10) . . . . ? 
C8 Rh1 C1 C6 169.3(7) . . . . ? 
N1 Rh1 C1 C6 -108.0(7) . . . . ? 
P1 Rh1 C1 C6 73.7(7) . . . . ? 
Cl1 Rh1 C1 C6 -20.3(11) . . . . ? 
C6 C1 C2 C4 -30.0(12) . . . . ? 
Rh1 C1 C2 C4 -147.3(9) . . . . ? 
C6 C1 C2 C3 31.1(10) . . . . ? 
Rh1 C1 C2 C3 -86.3(9) . . . . ? 
C4 C2 C3 C7 100.1(11) . . . . ? 
C1 C2 C3 C7 0.0(13) . . . . ? 
C1 C2 C3 C4 -100.1(10) . . . . ? 
C1 C2 C4 C5 -1.0(16) . . . . ? 
C3 C2 C4 C5 -99.3(13) . . . . ? 
C1 C2 C4 C3 98.3(11) . . . . ? 
C7 C3 C4 C5 3.3(13) . . . . ? 
C2 C3 C4 C5 102.7(10) . . . . ? 
C7 C3 C4 C2 -99.3(10) . . . . ? 
C2 C4 C5 C6 31.6(14) . . . . ? 
C3 C4 C5 C6 -34.7(12) . . . . ? 
C4 C5 C6 C7 55.2(11) . . . . ? 
C4 C5 C6 C1 -52.3(11) . . . . ? 
C2 C1 C6 C7 -54.0(10) . . . . ? 
Rh1 C1 C6 C7 67.9(9) . . . . ? 
C2 C1 C6 C5 52.0(10) . . . . ? 
Rh1 C1 C6 C5 173.9(7) . . . . ? 
C4 C3 C7 C6 29.9(11) . . . . ? 
C2 C3 C7 C6 -31.6(11) . . . . ? 
C5 C6 C7 C3 -53.3(10) . . . . ? 
C1 C6 C7 C3 54.1(10) . . . . ? 
C10 N1 C11 C12 2.9(13) . . . . ? 
Rh1 N1 C11 C12 176.1(7) . . . . ? 
N1 C11 C12 C13 -2.0(15) . . . . ? 
C11 C12 C13 C14 0.3(16) . . . . ? 
C12 C13 C14 C10 0.3(14) . . . . ? 
C12 C13 C14 C15 -178.1(10) . . . . ? 
C10 C14 C15 C16 1.5(15) . . . . ? 
C13 C14 C15 C16 179.9(10) . . . . ? 
C14 C15 C16 C17 -1.3(15) . . . . ? 
C15 C16 C17 C9 -1.0(15) . . . . ? 
C16 C17 C9 C10 2.9(13) . . . . ? 
C16 C17 C9 C8 -177.9(8) . . . . ? 
C11 N1 C10 C14 -2.3(13) . . . . ? 
Rh1 N1 C10 C14 -176.6(7) . . . . ? 
C11 N1 C10 C9 176.5(8) . . . . ? 
Rh1 N1 C10 C9 2.2(9) . . . . ? 
C15 C14 C10 N1 179.2(8) . . . . ? 
C13 C14 C10 N1 0.7(14) . . . . ? 
C15 C14 C10 C9 0.5(13) . . . . ? 
C13 C14 C10 C9 -178.0(8) . . . . ? 
C17 C9 C10 N1 178.5(8) . . . . ? 
C8 C9 C10 N1 -0.7(11) . . . . ? 
C17 C9 C10 C14 -2.7(13) . . . . ? 
C8 C9 C10 C14 178.1(7) . . . . ? 
C30 P1 C18 C23 84.9(9) . . . . ? 
C24 P1 C18 C23 -22.4(9) . . . . ? 
Rh1 P1 C18 C23 -153.5(7) . . . . ? 
C30 P1 C18 C19 -88.0(8) . . . . ? 
C24 P1 C18 C19 164.7(8) . . . . ? 
Rh1 P1 C18 C19 33.6(9) . . . . ? 
C23 C18 C19 C20 0.0(15) . . . . ? 
P1 C18 C19 C20 173.1(7) . . . . ? 
C18 C19 C20 C21 0.8(17) . . . . ? 
C19 C20 C21 C22 0.2(19) . . . . ? 
C20 C21 C22 C23 -2(2) . . . . ? 
C19 C18 C23 C22 -1.6(16) . . . . ? 
P1 C18 C23 C22 -174.5(9) . . . . ? 
C21 C22 C23 C18 2.6(19) . . . . ? 
C30 P1 C24 C29 14.9(9) . . . . ? 
C18 P1 C24 C29 122.3(8) . . . . ? 
Rh1 P1 C24 C29 -109.5(8) . . . . ? 
C30 P1 C24 C25 -171.4(8) . . . . ? 
C18 P1 C24 C25 -64.0(8) . . . . ? 
Rh1 P1 C24 C25 64.2(8) . . . . ? 
C29 C24 C25 C26 1.5(15) . . . . ? 
P1 C24 C25 C26 -172.4(8) . . . . ? 
C24 C25 C26 C27 0.5(16) . . . . ? 
C25 C26 C27 C28 -3.2(18) . . . . ? 
C26 C27 C28 C29 3.6(18) . . . . ? 
C27 C28 C29 C24 -1.5(17) . . . . ? 
C25 C24 C29 C28 -1.0(15) . . . . ? 
P1 C24 C29 C28 172.8(8) . . . . ? 
C24 P1 C30 C35 100.6(9) . . . . ? 
C18 P1 C30 C35 -7.1(10) . . . . ? 
Rh1 P1 C30 C35 -130.4(8) . . . . ? 
C24 P1 C30 C31 -78.1(8) . . . . ? 
C18 P1 C30 C31 174.2(8) . . . . ? 
Rh1 P1 C30 C31 50.9(8) . . . . ? 
C35 C30 C31 C32 -2.4(15) . . . . ? 
P1 C30 C31 C32 176.4(8) . . . . ? 
C30 C31 C32 C33 3.1(16) . . . . ? 
C31 C32 C33 C34 -1.0(17) . . . . ? 
C32 C33 C34 C35 -1.7(19) . . . . ? 
C31 C30 C35 C34 -0.5(15) . . . . ? 
P1 C30 C35 C34 -179.2(9) . . . . ? 
C33 C34 C35 C30 2.5(18) . . . . ? 
C17 C9 C8 O1 1.6(13) . . . . ? 
C10 C9 C8 O1 -179.3(8) . . . . ? 
C17 C9 C8 Rh1 179.6(7) . . . . ? 
C10 C9 C8 Rh1 -1.2(9) . . . . ? 
N1 Rh1 C8 O1 179.7(8) . . . . ? 
C1 Rh1 C8 O1 -85.8(8) . . . . ? 
P1 Rh1 C8 O1 5.7(8) . . . . ? 
Cl1 Rh1 C8 O1 98.8(8) . . . . ? 
N1 Rh1 C8 C9 1.8(5) . . . . ? 
C1 Rh1 C8 C9 96.3(6) . . . . ? 
P1 Rh1 C8 C9 -172.2(5) . . . . ? 
Cl1 Rh1 C8 C9 -79.1(6) . . . . ? 
  
loop_ 
 _geom_hbond_atom_site_label_D 
 _geom_hbond_atom_site_label_H 
 _geom_hbond_atom_site_label_A 
 _geom_hbond_distance_DH 
 _geom_hbond_distance_HA 
 _geom_hbond_distance_DA 
 _geom_hbond_angle_DHA 
 _geom_hbond_site_symmetry_A 
C36 H36A Cl1  0.98 2.68 3.429(15) 133.4 . 
  
_diffrn_measured_fraction_theta_max    0.999 
_diffrn_reflns_theta_full              25.00 
_diffrn_measured_fraction_theta_full   0.999 
_refine_diff_density_max    0.988 
_refine_diff_density_min   -1.303 
_refine_diff_density_rms    0.131 

#===================================================END                                    
